1 **Oct4 regulates embryonic pluripotency via metabolic mechanisms and**  
2 **Stat3 signalling**

3

4 Giuliano Giuseppe Stirparo<sup>1\*§</sup>, Agata Kurowski<sup>1,4§</sup>, Stanley Eugene  
5 Strawbridge<sup>1</sup>, Hannah Stuart<sup>1</sup>, Thorsten Edwin Boroviak<sup>2,3</sup>, Ayaka Yanagida<sup>1,3</sup>  
6 and Jennifer Nichols<sup>1,2,3\*</sup>

7

8 *Affiliations*

9 <sup>1</sup>Wellcome Trust – Medical Research Council Stem Cell Institute, University of  
10 Cambridge, Jeffrey Cheah Biomedical Centre, Puddicombe Way, Cambridge  
11 CB2 0AW, UK

12 <sup>2</sup>Department of Physiology, Development and Neuroscience, University of  
13 Cambridge, Tennis Court Road, Cambridge CB2 3EG, UK

14 <sup>3</sup>Centre for Trophoblast Research, University of Cambridge, UK

15 <sup>4</sup>Department of Pharmacological Sciences, Icahn School of Medicine at  
16 Mount Sinai, New York, NY 10029, USA

17

18 §These authors contributed equally

19 \*Authors for correspondence

20 [jn270@cam.ac.uk](mailto:jn270@cam.ac.uk)

21 [ggs28@cam.ac.uk](mailto:ggs28@cam.ac.uk)

22

23

24

25

26 *Highlights and novelty*

- 27       • Major pluripotency-associated transcription factors are activated in  
28       OCT4-deficient early mouse ICM cells, coincident with ectopic  
29       expression of trophoctoderm markers
- 30       • JAK/STAT signalling is defective in OCT4 null embryos
- 31       • OCT4 promotes expression of KATS enzymes by means of glycolytic  
32       production of Acetyl CoA to secure chromatin accessibility for  
33       acquisition of epiblast identity
- 34       • OCT4 regulates the metabolic and biophysical processes required for  
35       establishment of embryonic pluripotency

36

37 *Key Words*

38 OCT4

39 STAT3

40 Pluripotency

41 Trophoctoderm

42 Single cell quantification

43 Metabolism

44 **Abstract**

45 OCT4 is a fundamental component of the molecular circuitry governing  
46 pluripotency *in vivo* and *in vitro*. To determine how OCT4 protects the  
47 pluripotent lineage from differentiation into trophoblast, we used single cell  
48 transcriptomics and quantitative immunofluorescence on blastocysts and  
49 established differentially expressed genes and pathways between control and  
50 OCT4 null cells. Activation of most pluripotency-associated transcription  
51 factors in the early mouse inner cell mass appears independent of OCT4,  
52 whereas JAK/STAT signalling requires OCT4, via activation of IL6ST. Single  
53 cell deconvolution, diffusion component and trajectory inference dissected the  
54 process of differentiation of OCT4 null cells by activating specific gene-  
55 network and transcription factors. Downregulation of glycolytic and oxidative  
56 metabolism was observed. CHIPseq analysis suggests OCT4 directly targets  
57 rate-limiting glycolytic enzymes. Concomitant with significant disruption of the  
58 STAT3 pathway, oxidative respiration is significantly diminished in OCT4 null  
59 cells. Upregulation of the lysosomal pathway detected in OCT4 null embryos  
60 is likely attributable to aberrant metabolism.

## 61 **Introduction**

62 Formation of a mammalian organism pivots upon establishment of  
63 extraembryonic tissues to pattern the foetus and expedite connection with the  
64 maternal vascular system, whilst preserving a pluripotent population of cells  
65 with the responsive capacity to generate body pattern and tissues  
66 progressively during development. Specification of trophectoderm (TE,  
67 founder of the placenta) on the outside of the preimplantation embryo  
68 coincides with appearance of the blastocyst cavity and a metabolic switch  
69 from pyruvate and lactose to glucose utilisation with increased oxygen  
70 consumption<sup>1-5</sup>. This dramatic change heralds an increase in metabolic  
71 activity by the differentiating TE, comprising elevated ATP, amino acid  
72 turnover and mitochondrial count<sup>6,7</sup>. The murine embryo is equipped to  
73 overcome adverse consequences associated with accumulation of reactive  
74 oxygen species during the metabolic transition to oxidative phosphorylation,  
75 largely facilitated by the transcriptional enhancer factor TEAD4<sup>8,9</sup>. TEAD4  
76 becomes intensified in the TE, where it cooperates with nuclear YAP to initiate  
77 transcription of TE-specific genes<sup>10,11</sup>. TE differentiation is orchestrated by a  
78 specific set of transcription factors; acquisition of TE identity actuates distinct  
79 metabolic requirements compared with the undifferentiated inner cell mass  
80 (ICM). During blastocyst expansion, the transcription factor OCT4 (encoded  
81 by *Pou5f1*) becomes restricted to the ICM<sup>12</sup>. OCT4 is essential for  
82 establishment of the pluripotent epiblast, preventing differentiation of the  
83 embryo towards TE<sup>13</sup>, and is absolutely required for propagation of pluripotent  
84 stem cells *in vitro*<sup>13-17</sup>. Studies in embryonic stem cells (ESC) indicate that the  
85 pluripotency network hinges upon OCT4<sup>18-22</sup>. In the embryo OCT4 is detected

86 throughout cleavage<sup>12</sup>, whereas many other pluripotency-associated factors,  
87 such as NANOG, appear after the onset of zygotic genome activation<sup>23</sup>.  
88 However, in embryos lacking both maternal and zygotic OCT4, NANOG  
89 emerges robustly, coincidentally with OCT4-positive controls<sup>24,25</sup>, ruling out  
90 failure to express this key pluripotency network gene as a contributing feature  
91 of the OCT4 null phenotype. Whether absence of other pluripotency-  
92 associated factors could play a role has not been investigated at the single  
93 cell level. To date, evidence that the cells occupying an inside position in  
94 OCT4 null embryos adopt a TE identity is largely restricted to morphology and  
95 expression of TE-specific markers at the time of implantation<sup>13,24,26</sup>. To  
96 scrutinise the apparent lineage transition and probe the mechanism by which  
97 acquisition of pluripotency in OCT4 null ICMs fails we used single cell RNA  
98 sequencing (scRNAseq) and quantitative immunofluorescence (QIF) to  
99 examine gene expression in wild type, heterozygous and OCT4 null early and  
100 late blastocyst ICMs. Differences between samples and groups, calculated  
101 using bioinformatics and computational analysis, revealed novel insight into  
102 the role of OCT4 in defining the metabolic, pluripotent and biophysical status  
103 of the murine ICM.

## 104 **Results**

105 *Single cell transcriptional profiling reveals divergence of OCT4 null from wild*  
106 *type and heterozygous ICM cells by the mid blastocyst stage*

107 Following observation of NANOG protein in OCT4 null blastocysts<sup>24,25</sup>, we  
108 performed whole transcriptome analysis by scRNAseq of ICM cells isolated  
109 from *Pou5f1* heterozygous *inter se* mating at embryonic day (E)3.5 to  
110 investigate the entire pluripotency network. Quality control, as previously  
111 reported<sup>27</sup>, eliminated inadequate samples, leaving 29 null mutant (MUT), 42  
112 wild-type (WT) and 16 heterozygous (HET) cells from 4, 5 and 2 mid  
113 blastocysts, respectively (Fig.1A, Suppl.Table1). *Pou5f1* RNA expression was  
114 not detected in MUT embryos, confirming degradation of maternal transcripts  
115 (Fig.1A, Fig.S1A), consistent with lack of OCT4 protein observed at the  
116 morula stage<sup>13</sup>. To characterize global differences and similarities between  
117 genotypes t-SNE analysis was performed (Fig.1B, Fig.S1A) using the most  
118 variable genes identified in early blastocysts ( $n=2232$ ,  $\log_2\text{FPKM}>0.5$ ,  
119  $\log\text{CV}_2>0.5$ ). MUT cells cluster separately from HET and WT, suggesting  
120 major changes in transcriptome, despite no apparent difference in ICM  
121 morphology. Interestingly, HET and WT cells clustered together, indicating no  
122 more than a negligible effect of reduced *Pou5f1* in HET cells in the developing  
123 embryo, contrasting with the elevated and more homogeneous expression of  
124 *Nanog*, *Klf4* and Estrogen-related-receptor B (*Esrrb*) previously reported in  
125 *Oct4* HET ESCs<sup>28</sup> (Fig.S1B).

126 Weighted gene correlation network analysis (WGCNA) allows  
127 extraction of modules defined by co-regulated genes, combined with  
128 unsupervised clustering (Fig.1C, Fig.S1C). Two main modules emerged,

129 clustering cells according to genotype: module 1 co-clusters HET and WT and  
130 co-regulates pluripotency-associated genes such as *Pou5f1*, *Gdf3* and  
131 *Zfp422*<sup>29-31</sup> (Fig.S1D); module 2 is specific for MUT cells, expressing  
132 established TE markers, including *Hand1*, *Krt18* and *Gata3* (Fig.S1D)<sup>32-35</sup>.  
133  
134 *Activation of major pluripotency network elements in the mouse blastocyst is*  
135 *independent of OCT4, but suppression of ectopic TE expression is not*  
136 In light of the significant transcriptional differences revealed, we sought insight  
137 into regulation of the pluripotency network in WT/HET and MUT cells (Fig.1D,  
138 Fig.S1D, Suppl.Table2). Consistent with previously published  
139 immunohistochemistry (IHC) data<sup>24,25</sup> *Nanog* was detected, albeit  
140 heterogeneously, in MUT cells (Fig.1D). Conversely, *Sox2* was not  
141 significantly affected in MUT cells at both RNA (Fig.1D) and protein levels  
142 (Fig.1E), as detected by quantitative immunofluorescence (QIF)<sup>36</sup>. *Esrrb*,  
143 reported to be a direct OCT4 target *in vivo*<sup>24</sup>, showed modest downregulation  
144 in MUT cells by scRNAseq (Fig.1D), but no obvious difference at the protein  
145 level via QIF (Fig.1F) suggesting initiation of expression independent of OCT4  
146 in early blastocysts. Specific chromatin components are involved in  
147 establishing and maintaining pluripotency *in vivo* and *in vitro*<sup>37</sup>. *Utf1*, a direct  
148 target of OCT4<sup>38</sup>, is expressed in normal ICM and epiblast<sup>39</sup>; its expression  
149 decreases upon differentiation<sup>40</sup>, consistent with its role in maintaining  
150 chromatin structure compatible with self-renewal *in vitro*<sup>41</sup>. As expected, *Utf1*  
151 was not detected in MUT early blastocysts (Fig.1D). TE markers, such as  
152 *Btg1*, *Hand1* and *Gata3* were found in most MUT cells, whereas *Cdx2* was  
153 poorly represented (5/29 MUT cells; Fig.1G), suggesting that TE

154 differentiation of MUT cells is not primarily directed by *Cdx2*, although its  
155 protein appears in the majority of OCT4 null ICMs by E4.0<sub>26</sub>.  
156  
157 *Reduction of JAK/STAT signalling machinery distinguishes OCT4 null ICMs*  
158 The JAK/STAT signalling pathway is fundamental for self-renewal and  
159 pluripotency *in vivo* and *in vitro*<sup>42-44</sup>. Active P-STAT3 protein and its targets  
160 *Klf4*<sup>45</sup> and *Tfcp2l1*<sup>46</sup> were significantly lower in MUT cells at both protein and  
161 mRNA levels (Fig.2A-D). Total *Stat3* mRNA levels did not vary (Fig. S2A).  
162 The reduced STAT3 signalling in MUT embryos was most likely attributable to  
163 absence of its upstream cytokine receptor subunit, *gp130* (*Il6st*) (Fig.2A). *Il6st*  
164 is also a putative target of OCT4 in ESC (Suppl.Table3, [https://chip-](https://chip-atlas.org/)  
165 [atlas.org/](https://chip-atlas.org/)). Unsurprisingly, Suppressor of Cytokine Signalling (*Socs*)<sup>3</sup>, a direct  
166 STAT3 target that exerts negative feedback regulation<sup>47</sup> was barely  
167 detectable in MUT cells (Fig.2A). PCA computed with genes in JAK/STAT  
168 signalling pathway (<https://www.genome.jp/kegg/>) segregates MUT from  
169 WT/HET cells (Fig.2E); cumulative sum on the relative percentage of gene  
170 expression is significantly higher ( $pval < 0.05$ ) in WT/HET, indicating that in  
171 MUT cells the pathway is downregulated (Fig.2F).

172 The results presented thus far reveal reduced expression of certain  
173 factors in MUT cells, particularly direct OCT4 targets and JAK/STAT pathway  
174 members, as well as ectopic activation of some TE marker genes, indicating  
175 transcriptional divergence in MUT cells by E3.5.

176

177 *Dissecting overt impairment of lineage segregation in maturing OCT4 null*  
178 *ICMs*



179 For detailed characterisation of events associated with diversion of ICM to TE  
180 in embryos lacking OCT4, diffusion component analysis was performed on  
181 implanting embryos 24 hours older (E4.5) (Fig.3A; Fig.S3A); 19 cells isolated  
182 from 2 MUT, 22 from 2 WT and 44 from 4 HET late ICMs were analysed  
183 (Suppl.Table1, Fig. 3B,C). The expression level of *Pou5f1* was measured in  
184 each cell (Fig.S3B). WT and HET cells assume identity of either epiblast (EPI)  
185 or primitive endoderm (PrE): 39 versus 33 respectively (Fig.3A-C Fig.S3A).  
186 No MUT cells cluster in proximity of EPI or PrE (Fig.3A, Fig.S3A). ScRNAseq  
187 failed to identify any significant expression of maturing PrE markers such as  
188 *Sox17*, *Gata4* or *Sox7* (Fig.3D) in MUTs, as predicted from previous IHC or  
189 bulk RNA analysis<sup>24,25</sup>. Rarely, MUT cells expressed *Pdgfra*, probably  
190 reflecting initiation of expression prior to loss of maternal OCT4, since  
191 PDGFR $\alpha$ , like GATA6, is a very early presumptive PrE marker<sup>48,49</sup>.

192 WGCNA revealed independent clustering of MUT cells and co-  
193 expression of specific genes normally mutually exclusive by E4.5 (Fig.S3C,  
194 Suppl.Table4). We assessed quantitatively and qualitatively the PrE and EPI  
195 genes underrepresented in MUTs (Fig.3E, Fig.S3D, see methods). A  
196 significant drop in intensity in MUT cells was observed, suggesting global  
197 failure to activate both PrE and EPI transcription networks. In normal late  
198 blastocysts *Gata6* becomes restricted to a subset of cells constituting the PrE.  
199 As expected, in WT/HET embryos its expression is mutually exclusive with  
200 *Nanog* (Fig.S3E)<sup>49,50</sup>. However, in MUTs, 7/19 cells co-expressed *Gata6* and  
201 *Nanog* (Fig.S3E), suggesting a role for OCT4 in mediating mutual repression,  
202 as previously suggested<sup>24</sup>. PrE induction and differentiation is mediated by  
203 FGF4 produced from EPI cells<sup>51</sup> interacting with FGF receptors (R)1 and

204 252,53. The failure of this early lineage segregation in MUT ICMs confirms the  
205 requirement for OCT4 induction of FGF4<sup>13</sup> and places this obligation at an  
206 early stage in PrE/EPI specification. Consistent with previous findings<sup>13</sup>, E4.5  
207 MUT cells do not express FGF4 but upregulate FGFR1 and FGFR2 (Fig.S3F).  
208 We adapted a model of the gene network involved in the second lineage  
209 decision<sup>54</sup> in the WT/HETs compared with MUT cells. In the presence of  
210 OCT4, EPI cells express NANOG and FGF4 (Fig.3F). FGF4 drives PrE fate  
211 transition and restriction<sup>55</sup> by triggering ERK signalling, suppressing NANOG  
212 and activating PrE markers SOX17, GATA4 and SOX7. However, in MUT  
213 cells ERK signal is disrupted and generally downregulated (Fig.S3G) and  
214 consequently PrE markers are absent (Fig.3G).

215       Having identified normal expression of some pluripotency factors in  
216 early MUT blastocysts we examined the role of OCT4 in late blastocysts by  
217 inspecting expression of EPI-enriched genes (n=814, Fig.3E) and  
218 pluripotency markers. Ternary plots represent expression density between  
219 three different conditions. We reasoned that if MUT cells fail to express EPI-  
220 enriched genes globally, a bias in the density distribution would be expected.  
221 Indeed, the EPI/ICM sides of the triangle showed the highest density for EPI  
222 enriched genes when compared with MUT (Fig.3H). We then explored how  
223 pluripotency and TE associated factors were distributed along the ternary plot.  
224 Genes not expressed in MUT cells are located on the axis connecting ICM  
225 and EPI; these include *Utf1*, *Pou5f1*, *Lefty2* and *TdGF1*. Overall, most  
226 pluripotency factors cluster at the ICM/EPI side, indicating lower but  
227 detectable expression in the E4.5 MUT cells (Fig.3I) or TE cells (Fig.S3H).  
228 Conversely, genes associated with TE identity, *Gata2*, *Gata3*, *Eomes*, *Id2*,

229 *Elf5* and the Notch signalling pathway<sup>35,56-60</sup> are located on the side specific  
230 for MUT (Fig.3I) and TE cells (Fig.S3H). Interestingly we found that *Tead4*,  
231 which is a crucial transcriptional regulator of mitochondrial function in TE, is  
232 not upregulated in MUT cells, suggesting impairment of mitochondrial function  
233 not directly associated with transition of MUT cells to TE (Fig.3I).

234

235 *OCT4* MUT cells acquire TE-like identity but exhibit specific differences  
236 compared with normal TE

237 To understand how OCT4 represses TE transcription factors during normal  
238 ICM development, we sought to identify specific and common gene  
239 expression between WT TE and MUT cells. We consulted published TE single  
240 cell data from E3.5 and E4.0 embryos<sup>61</sup> Diffusion component analysis,  
241 coupled with pseudotime reconstruction and non-linear regression, allowed us  
242 to identify different developmental trajectories (Fig.4A). Loss of OCT4 and  
243 subsequent activation of TE genes drives E4.5 MUT cells towards WT TE.  
244 Deconvolution of heterogeneous populations<sup>62</sup> is an analysis designed to  
245 estimate percentage identity of distinctive cells towards a specific endpoint.  
246 To quantify similarities between TE and WT/HET/MUT late blastocyst cells we  
247 performed quadratic programming to resolve a non-negative least-squares  
248 constraint problem (Fig.4B). Similarity between TE and MUT cells was  
249 highest, with a median value of ~0.6 (60%), compared to ~0.2 (20%) and  
250 ~0.25 (25%) with EPI and PrE cells respectively. We further validated this  
251 result with Gene Set Enrichment Analysis (GSEA) by comparing the rank of  
252 differentially expressed genes between E4.5 EPI (PrE)/E4.0 TE and E4.5 EPI  
253 (PrE)/E4.5 MUT (Fig.S4A,B). Together, these results indicate that late

254 blastocyst MUT cells share a significant portion of the TE transcriptional  
255 program. Since our embryos were recovered from nascent implantation sites,  
256 they are likely more advanced than those exhibiting non-TE identity profiled  
257 previously<sup>24</sup>. We performed a two-way hierarchical analysis with published  
258 TE-enriched genes<sup>63</sup> (Fig.4C,D). Transcripts enriched in early and late TE  
259 cells, such as *Krt18*, *Krt8*, *Gata3* and *Id2*<sup>34,59,64,65</sup> were also upregulated in  
260 MUT cells. Interestingly we also detected co-expression of *Fabp3* and *Cldn4*  
261 (Fig.4E). *Fabp3* regulates fatty acid transport in trophoblast cells and plays a  
262 central role in fetal development<sup>66</sup>. *Cldn4* is essential for tight junction  
263 formation between TE cells during blastocyst formation<sup>67</sup>. We also identified  
264 genes expressed in early and late TE not consistently detected in MUT cells,  
265 indicating aberrant establishment of the TE transcriptional network. As  
266 suggested by pseudotime and diffusion component analysis (Fig.4A), E4.5  
267 MUT cells fail to express a proportion of late TE markers.

268         HIPPO signalling promotes the first lineage decision in mouse  
269 embryos<sup>10,68</sup>. The three major components of this pathway are the upstream  
270 modulators, the core kinase components and the downstream mediators<sup>69</sup>.  
271 *Amotl2*, expressed in human and mouse TE and required for TE cell  
272 morphology<sup>70</sup>, is also upregulated in MUT cells. Moreover, STK3, a  
273 component of the HIPPO core kinase, phosphorylates LATS1/2, which in turn  
274 phosphorylates YAP1. Phosphorylated YAP1 is inhibited from entering the  
275 nucleus, thus activating HIPPO. Consistent with the role of STK3, AMOTL2  
276 and LATS2 in modulation of the HIPPO pathway, their transcripts were co-  
277 expressed in TE and MUT cells (Fig.4F). This suggests a potential role for  
278 OCT4 in regulating the balance of HIPPO signalling in MUT cells and

279 therefore initiating the differentiation to TE. MUT cells thus differentiate by  
280 expressing a combination of specific early TE transcription factors, signalling  
281 pathways and metabolic genes.

282

### 283 *Role of OCT4 in regulation of metabolism*

284 It was previously suggested that OCT4 null embryos exhibit defective  
285 metabolism by the mid-late blastocyst stage<sup>24</sup> and that changes in acetyl-  
286 CoA, mediated by glycolysis, control early differentiation<sup>71</sup>. We performed  
287 principal component analysis with glycolytic genes. Dimension 1, which  
288 explains the largest variability, segregates MUT from EPI/PrE cells (Fig. 5A).  
289 The majority of enzymes were downregulated in MUT cells (Fig.5B,C,  
290 Fig.S5A) and, interestingly, the rate limiting glycolytic enzymes *Hk2* and *Pkm*  
291 together with *Eno1* and *Pgk1* are also putative targets of OCT4 (Fig.5D).  
292 KATS enzymes rely on acetyl-CoA, a product of glycolysis, to acetylate the  
293 lysine residues on histone proteins and maintain the open chromatin structure  
294 associated with pluripotency. We observed a significant downregulation of  
295 several KATS enzymes (Fig.5E) in MUT cells, suggesting that OCT4, by  
296 regulating glycolysis<sup>72</sup> indirectly provides sufficient acetyl-CoA to support an  
297 open chromatin state.

298 To assess systematically the modulated biological processes and  
299 pathways we identified 419 common variable genes between E4.5 MUT/E4.5  
300 EPI and E4.5 MUT/E4.5 PrE (Fig.5F) and computed KEGG pathway  
301 enrichment (Fig.5G). “Tight junction“, “cell adhesion molecule“ and “regulation  
302 of actin cytoskeleton“ processes suggest that OCT4 regulates important  
303 components of biophysical properties of ICM cells. Interestingly, the most

304 significant enriched process was “Lysosome”, indicating a strong and pivotal  
305 role of this pathway in MUT cells. Accordingly, processes related to  
306 “Lysosome” were also significantly enriched, including “Peroxisome”,  
307 “Glycerophospholipid Metabolism”, “Endocytosis”, “PPAR signalling pathway”  
308 and “Vali, leu and ile degradation”.

309

310 *TFEB translocates into the nucleus in cells lacking OCT4*

311 To determine whether the activation of the lysosomal pathway was a TE  
312 characteristic we explored differentially expressed genes and found that only  
313 MUT cells, but not WT TE, upregulated a significant proportion of lysosomal  
314 genes (Fig.6A). Lysosome is essential for recycling, recruitment of lipids via  
315 autophagy and hydrolases, for redistribution of catabolites to maintain cellular  
316 function<sup>73</sup>. Autophagy is a catabolic response to starvation<sup>74</sup>. Most autophagy-  
317 related genes, such as *Atg*, were upregulated in MUT cells (Fig.6B).  
318 Moreover, MUT cells undergo a significant upregulation of fatty acid  
319 degradation genes (Fig.6C). The master regulator of lysosomal biogenesis  
320 and autophagy is TFEB<sup>74</sup>. TFEB is dissociated by inactive mTORC1 and  
321 migrates into the nucleus to activate lysosomal/autophagy genes. The positive  
322 regulator of mTORC1 (*Rptor*) is downregulated in MUT cells and, consistently,  
323 we found upregulation of *Deptor*, a known negative regulator of mTORC1<sup>75</sup>  
324 (Suppl.Table5). To confirm activation of the lysosomal pathway via TFEB, we  
325 performed IHC on *Oct4* conditionally deleted ESC. In OCT4-positive cells,  
326 TFEB is localized mainly in the cytoplasm. After OCT4 deletion, a significant  
327 translocation of TFEB from cytosol to nucleus occurs (Fig.6D, Fig.S6A).  
328 Together, these results indicate that, in response to an altered and energy

- 329 insufficient metabolism, MUT cells upregulate lysosomal and autophagy  
330 pathways to provide cellular energy.

## 331 Discussion

332 Apart from the known direct targets of OCT4, such as *Utf1*<sup>40</sup> expression of  
333 most other pluripotency-associated factors, including the essential embryonic  
334 pluripotency factors NANOG, SOX2 and ESRRB, is not significantly different  
335 between MUT cells and WT/HETs at the mid blastocyst stage (E3.5) at both  
336 the mRNA and protein level. Detection of most pluripotency-associated  
337 factors in OCT4 MUT mid blastocysts suggests independence from OCT4 at  
338 this stage, confirming that the state of naïve pluripotency, as captured in the  
339 form of ESCs *in vitro*, is not yet attained by the ICM, as reported previously<sup>76</sup>.

340 Down-regulation of *Utf1* suggests an indirect role for OCT4 in  
341 governing epigenetic structure of pluripotent cells, which may account for the  
342 precocious expression of some TE factors in MUT cells, preceding changes in  
343 expression of most pluripotency factors. Another putative OCT4 target, *Il6st*,  
344 is a co-receptor essential for STAT3 signalling in ESCs<sup>77</sup>. We observed  
345 significant downregulation of STAT3 target genes in MUT cells as well as  
346 reduced P-STAT3 protein and its pluripotency-associated targets, TFCEP2L1  
347 and KLF4<sup>45,46</sup>. Diversion of ICM cells to TE has been observed in a proportion  
348 of embryos following maternal/zygotic deletion of *Stat3*, which was attributed  
349 to loss of activation of *Oct4*<sup>43</sup>. The diminution of *Socs3* exhibited by MUT cells  
350 is an expected direct consequence of reduced STAT3 activity.

351 Signalling pathways related to matrix organization, including regulation  
352 of actin cytoskeleton and cell adhesion molecules are significantly affected in  
353 MUT cells. Such processes are associated with exit from pluripotency<sup>78</sup>;  
354 cytoskeletal conformational changes inducing cell spreading are associated



355 with differentiation. Our results therefore implicate OCT4 as a mediator for  
356 regulation of the biophysical properties of undifferentiated cells.

357 In this study we dissected the role of metabolism in OCT4 MUT cells.  
358 We linked the reduction of glycolysis with the downregulation of most *Kats*  
359 enzymes. KATS enzymes rely on acetyl-CoA, a product of glycolysis, to  
360 acetylate the lysine residues on histone proteins and maintain an open  
361 chromatin structure, associated with pluripotency. *Kats* enzymes are lower in  
362 MUT cells, suggesting that OCT4, by regulating glycolysis<sup>72</sup>, indirectly  
363 provides sufficient acetyl-CoA to support an open chromatin state. We  
364 revealed that most enzymes in glycolytic pathways are downregulated in MUT  
365 cells. This may be because some of the rate-limiting enzymes (*Hk2*, *Pgk1*,  
366 *Pkm* and *Eno1*) are putative targets of OCT4. We also noted downregulation  
367 in MUT cells of genes associated with cell respiration. This is likely to be a  
368 downstream effect of reduced STAT3 signalling in MUT cells, consistent with  
369 the recent report that STAT3 promotes oxidative respiration for maintenance  
370 and induction of pluripotency<sup>79</sup> (Fig. 7A,B). Consequently, respiration  
371 processes are disrupted in OCT4 MUT cells where STAT3 is strongly  
372 downregulated.

373 Our scRNAseq data indicates that TFEB pathway is specifically  
374 activated in MUT cells as they transition to TE. We provide functional  
375 evidence for the requirement for OCT4 in lysosomal activity by demonstrating  
376 TFEB translocation into the nucleus during conditional deletion of *Oct4* in  
377 ESCs. We propose that MUT cells upregulate lysosomal gene expression and  
378 autophagy to counteract the downregulation of glycolysis and the tricarboxylic

379 acid cycle. Thus, OCT4 is required to maintain the metabolic state needed for  
380 survival of pluripotent cells.

381 In summary, our systematic analysis at the single cell level reveals an  
382 *in vivo* function for OCT4 in regulating metabolic and biophysical cellular  
383 properties via energy metabolism, cell morphology and chromatin accessibility  
384 for establishment of pluripotency in the developing mouse embryo (Fig.7).

385

386 *Acknowledgements*

387 We are grateful to Lawrence Bates, Kevin Chalut, Rosalind Drummond, Peter  
388 Humphreys, Kenneth Jones, Masaki Kinoshita, Carla Mulas and Maike  
389 Paramor for material, intellectual and technical contribution to the project.  
390 This work was supported by the University of Cambridge, BBSRC project  
391 grant RG74277, MRC PhD studentships for AK and HS and a core support  
392 grant from the Wellcome Trust and MRC to the Wellcome Trust – Medical  
393 Research Council Cambridge Stem Cell Institute.

394

395 *Author contributions*

396 JN, AK and GGS conceived the project; AK, AY, HS, TEB and JN carried out  
397 experiments; GGS performed data analysis; AK and SES performed imaging  
398 analysis; all authors contributed to writing the manuscript.

399

400 *Competing interests*

401 The authors have no competing interests

402

403

404

405

406

407

408

409

410

411 **Figure Legends**

412 **Figure1:** (A) Schematic of number of single cells per embryo (E3.5 stages)  
413 and their genotype. Barplot shows FPKM expression of *Pou5f1* for each  
414 single cell. (B) t-SNE plot for early blastocyst cells. Sample colour represents  
415 the different genotypes. (C) One-way hierarchical cluster of eigengenes value  
416 computed from WGCNA (power 10; dist=0.35, size =30). (D) FPKM  
417 expression of genes associated with Pluripotency. (E) Confocal images and  
418 normalized expression of OCT4 HET and MUT embryos stained for SOX2  
419 and (F) ESRRB. (G) FPKM expression of trophectoderm markers.

420

421 **Figure2:** (A) FPKM expression of genes in STAT3 pathway. (B) Confocal  
422 images and normalized expression of OCT4 HET and MUT embryos stained  
423 for p-STAT3, (C) TFCEP2L1, and (D) KLF4. (E) PCA computed with genes in  
424 KEGG JAK/STAT signalling pathway. (F) Cumulative sum of relative  
425 percentages between the expression of genes in STAT3 pathway (KEGG);  
426 student's t-test p.val < 0.05.

427

428 **Figure3:** (A) Diffusion plot of early and late blastocyst cells; color represents  
429 the different genotypes and lineages. (B) Dendrogram (agglomeration  
430 method: ward.D2) for late blastocyst ICM WT/HET cells and (C) schematic  
431 representation of number of late ICM single cells per embryo and their  
432 genotype. (D) Single cell FPKM expression of PrE markers (*Pdgfra*, *Sox17*,  
433 *Gata4*, *Sox7*) in PrE and MUT cells. (E) Top: Venn diagram showing the  
434 number of significant (padj<0.05) and enriched PrE and EPI genes. Bottom:  
435 Boxplot of log<sub>2</sub>FPKM in late blastocyst PrE and MUT cells of 667 genes and

436 late blastocyst EPI and MUT cells of 517 genes. (F) Network of genes  
437 associated with PrE specification in WT cells and (G) mutant cells. (H)  
438 Ternary plot of early WT/HET early blastocyst cells, WT/HET EPI and MUT  
439 cells. Axes show the relative fraction of expression of 814 EPI enriched genes  
440 or (I) pluripotent and trophectoderm associated genes.

441

442 **Figure4:** (A) Left panel: diffusion component plot for E3.5/E4.5 WT/HET/MUT  
443 cells (this study) and E3.5 and E4.0 TE cells from Deng et al., 2014. Color  
444 represents the different genotypes/lineages. Trajectory lines were fitted with  
445 cubic line ( $\lambda = 0.01$ ). Right panel: diffusion component and pseudotime  
446 expression. (B) Fraction of similarities between E4.5 EPI (WT/HET)/E4.5 PrE  
447 (WT/HET)/E4.5 MUT and E4.0 TE cells computed using all expressed genes  
448 ( $\log_2\text{FPKM} > 0$ ). (C) Heatmap of TE markers identified by Blakeley et al., 2015  
449 between ICM and TE single cells. (D) Identification of lineage trajectories and  
450 loess curve fitting between pseudotimes and  $\log_2\text{FPKM}$  for *Id2*, *Krt18*, *Krt8*,  
451 *Gata3*. (E) Loess curve fitting between pseudotimes and  $\log_2\text{FPKM}$  for *Fabp3*  
452 and *Cldn4*. (F) Boxplot of FPKM expression of genes in HIPPO signalling  
453 pathway.

454

455 **Figure5:** (A) PCA plot of E4.5 WT/HET and MUT cells computed with genes  
456 in glycolysis/gluconeogenesis KEGG pathway. (B) Glycolysis pathway with  
457 the associated enzymes (arrows) colored by the ratio between E4.5 WT/HET  
458 and MUT cells and (C) heatmap of the associated enzymes. (D) Volcano plot  
459 showing the contribution on principal component 1 (Fig.5A) and OCT4  
460 CHIPseq score in mESC. (E) Boxplot of Kats gene expression value in E4.5

461 EPI/PrE WT/HET, E4.0 TE and E4.5 MUT (Student's t-test; \*  $p < 0.05$ , \*\*  
462  $p < 0.01$ , \*\*\* $p < 0.001$ ). (F) Number of variable genes between E4.5 WT  
463 EPI/MUT and E4.5 WT PrE/MUT. (G) Enrichment of KEGG pathways  
464 computed with 419 common variable genes between MUT and E4.5 EPI/PrE.

465

466 **Figure6:** (A) Volcano plot of lysosomal genes variable between E4.5 WT/HET  
467 and E4.5 MUT and between WT TE and WT ICM (Blakeley et al., 2015). (B)  
468 Scatter plot of autophagy related genes (*Atgs*) between E4.5 WT/HET ICM  
469 and E4.5 MUT. (C) Enzymes in fatty acid oxidation and synthetase; color  
470 represents the ratio between E4.5 WT/HET and MUT cells. (D) TFEB  
471 localization in OCT4<sup>+/+</sup> and OCT4<sup>-/-</sup> cells cultured in CHIR+LIF.

472

473 **Figure7:** Scheme of OCT4 function in pre-implantation embryo development.

474

#### 475 **Supplementary figures**

476 **FigureS1:** (A) t-SNE plot for early blastocyst cells. Sample colors represent  
477 *Pou5f1* log<sub>2</sub> expression. (B) Barplots for *Nanog*, *Klf4* and *Esrrb* expression.  
478 (C) Genes dendrogram computed with WGCNA. (D) Heatmap showing the  
479 top co-regulated genes between E3.5 MUT and E3.5 WT/HET (> 5  
480 interaction; n=346 MUT genes and n=398 WT/HET genes).

481

482 **FigureS2:** Barplot of total *Stat3* expression for E3.5 WT, HET and MUT cells.

483

484 **FigureS3:** (A) Diffusion plot of early and late blastocyst cells; color represents  
485 *Pou5f1* expression. (B) Barplot shows FPKM expression of *Pou5f1* for each

486 single cell at E4.5 stage. (C) One-way hierarchical cluster of eigengenes  
487 value computed from WGCNA (power 8; dist=0.35, size =30) (D) Density  
488 distribution of log<sub>2</sub>FPKM in late blastocyst PrE and MUT cells of 667 genes  
489 and late blastocyst EPI and MUT cells of 517 genes. (E) Scatter plot of *Nanog*  
490 and *Gata6* FPKM expression values for E4.5 EPI (WT/HET), E4.5 PrE  
491 (WT/HET) and E4.5 MUT cells. (F) log<sub>2</sub>FPKM expression of *Fgf4*, *Fgfr1* and  
492 *Fgfr2* in WT/HET EPI/PrE and MUT cells. (G) log<sub>2</sub>FPKM scatter plot of MAPK  
493 signalling genes between late PrE and MUT blastocyst cells. (H) Ternary plot  
494 of early WT/HET blastocyst cells, WT/HET EPI and TE cells. Axes show the  
495 density of the relative fraction of expression.

496

497 **FigureS4:** (A) GSEA analysis computed with log<sub>2</sub>FC between E4.5 EPI-  
498 WT.HET/E4.0 TE and (B) E4.5 MUT/E4.0 TE.

499

500 **FigureS5:** TCA associated enzymes (arrows) color by the ratio between E4.5  
501 WT and MUT cells and heatmap of the associated enzymes.

502

503 **FigureS6:** TFEB localization in OCT4<sup>+/+</sup> and OCT4<sup>-/-</sup> cells cultured in  
504 CHIR+LIF.

505

506

507 **References**

- 508 1 Trimarchi, J. R., Liu, L., Porterfield, D. M., Smith, P. J. & Keefe, D. L.  
509 Oxidative phosphorylation-dependent and -independent oxygen  
510 consumption by individual preimplantation mouse embryos. *Biol Reprod*  
511 **62**, 1866-1874 (2000).
- 512 2 Gardner, D. K. Changes in requirements and utilization of nutrients during  
513 mammalian preimplantation embryo development and their significance  
514 in embryo culture. *Theriogenology* **49**, 83-102 (1998).
- 515 3 Johnson, M. T., Mahmood, S. & Patel, M. S. Intermediary metabolism and  
516 energetics during murine early embryogenesis. *J Biol Chem* **278**, 31457-  
517 31460, doi:10.1074/jbc.R300002200 (2003).
- 518 4 Benos, D. J. & Balaban, R. S. Energy metabolism of preimplantation  
519 mammalian blastocysts. *Am J Physiol* **245**, C40-45,  
520 doi:10.1152/ajpcell.1983.245.1.C40 (1983).
- 521 5 Lane, M. & Gardner, D. K. Selection of viable mouse blastocysts prior to  
522 transfer using a metabolic criterion. *Hum Reprod* **11**, 1975-1978 (1996).
- 523 6 Houghton, F. D. Energy metabolism of the inner cell mass and  
524 trophoctoderm of the mouse blastocyst. *Differentiation* **74**, 11-18,  
525 doi:10.1111/j.1432-0436.2006.00052.x (2006).
- 526 7 Leese, H. J. Metabolism of the preimplantation embryo: 40 years on.  
527 *Reproduction* **143**, 417-427, doi:10.1530/REP-11-0484 (2012).
- 528 8 Kaneko, K. J. & Depamphilis, M. L. TEAD4 establishes the energy  
529 homeostasis essential for blastocoel formation. *Development* **140**, 3680-  
530 3690, doi:10.1242/dev.093799  
531 dev.093799 [pii] (2013).



- 532 9 Kumar, R. P. *et al.* Regulation of energy metabolism during early  
533 mammalian development: TEAD4 controls mitochondrial transcription.  
534 *Development* **145**, doi:10.1242/dev.162644 (2018).
- 535 10 Nishioka, N. *et al.* The Hippo signaling pathway components Lats and Yap  
536 pattern Tead4 activity to distinguish mouse trophectoderm from inner  
537 cell mass. *Dev Cell* **16**, 398-410, doi:10.1016/j.devcel.2009.02.003 (2009).
- 538 11 Yagi, R. *et al.* Transcription factor TEAD4 specifies the trophectoderm  
539 lineage at the beginning of mammalian development. *Development* **134**,  
540 3827-3836, doi:dev.010223 [pii]  
541 10.1242/dev.010223 (2007).
- 542 12 Palmieri, S. L., Peter, W., Hess, H. & Scholer, H. R. Oct-4 transcription factor  
543 is differentially expressed in the mouse embryo during establishment of  
544 the first two extraembryonic cell lineages involved in implantation. *Dev.*  
545 *Biol.* **166**, 259-267 (1994).
- 546 13 Nichols, J. *et al.* Formation of pluripotent stem cells in the mammalian  
547 embryo depends on the POU transcription factor Oct4. *Cell* **95**, 379-391  
548 (1998).
- 549 14 Mulas, C. *et al.* Oct4 regulates the embryonic axis and coordinates exit  
550 from pluripotency and germ layer specification in the mouse embryo.  
551 *Development* **145**, doi:10.1242/dev.159103 (2018).
- 552 15 Niwa, H., Miyazaki, J. & Smith, A. G. Quantitative expression of Oct-3/4  
553 defines differentiation, dedifferentiation or self-renewal of ES cells. *Nat*  
554 *Genet* **24**, 372-376 (2000).

- 555 16 Masui, S. *et al.* Pluripotency governed by Sox2 via regulation of Oct3/4  
556 expression in mouse embryonic stem cells. *Nat Cell Biol* **9**, 625-635,  
557 doi:ncb1589 [pii]  
558 10.1038/ncb1589 (2007).
- 559 17 Osorno, R. *et al.* The developmental dismantling of pluripotency is  
560 reversed by ectopic Oct4 expression. *Development* **139**, 2288-2298,  
561 doi:139/13/2288 [pii]  
562 10.1242/dev.078071 (2012).
- 563 18 Kuroda, T. *et al.* Octamer and Sox elements are required for  
564 transcriptional cis regulation of Nanog gene expression. *Mol Cell Biol* **25**,  
565 2475-2485, doi:25/6/2475 [pii]  
566 10.1128/MCB.25.6.2475-2485.2005 (2005).
- 567 19 Loh, Y. H. *et al.* The Oct4 and Nanog transcription network regulates  
568 pluripotency in mouse embryonic stem cells. *Nat Genet* **38**, 431-440,  
569 doi:ng1760 [pii]  
570 10.1038/ng1760 (2006).
- 571 20 Rodda, D. J. *et al.* Transcriptional regulation of nanog by OCT4 and SOX2. *J*  
572 *Biol Chem* **280**, 24731-24737, doi:M502573200 [pii]  
573 10.1074/jbc.M502573200 (2005).
- 574 21 Chambers, I. & Tomlinson, S. R. The transcriptional foundation of  
575 pluripotency. *Development* **136**, 2311-2322, doi:136/14/2311 [pii]  
576 10.1242/dev.024398 (2009).
- 577 22 Tomioka, M. *et al.* Identification of Sox-2 regulatory region which is under  
578 the control of Oct-3/4-Sox-2 complex. *Nucleic Acids Res* **30**, 3202-3213  
579 (2002).

- 580 23 Chambers, I. *et al.* Functional expression cloning of Nanog, a pluripotency  
581 sustaining factor in embryonic stem cells. *Cell* **113**, 643-655 (2003).
- 582 24 Frum, T. *et al.* Oct4 cell-autonomously promotes primitive endoderm  
583 development in the mouse blastocyst. *Dev Cell* **25**, 610-622,  
584 doi:10.1016/j.devcel.2013.05.004  
585 S1534-5807(13)00278-5 [pii] (2013).
- 586 25 Le Bin, G. C. *et al.* Oct4 is required for lineage priming in the developing  
587 inner cell mass of the mouse blastocyst. *Development* **141**, 1001-1010,  
588 doi:10.1242/dev.096875  
589 dev.096875 [pii] (2014).
- 590 26 Ralston, A. *et al.* Gata3 regulates trophoblast development downstream of  
591 Tead4 and in parallel to Cdx2. *Development* **137**, 395-403, doi:137/3/395  
592 [pii]  
593 10.1242/dev.038828 (2010).
- 594 27 Stirparo, G. G. *et al.* Integrated analysis of single-cell embryo data yields a  
595 unified transcriptome signature for the human pre-implantation epiblast.  
596 *Development* **145**, doi:10.1242/dev.158501 (2018).
- 597 28 Karwacki-Neisius, V. *et al.* Reduced Oct4 expression directs a robust  
598 pluripotent state with distinct signaling activity and increased enhancer  
599 occupancy by Oct4 and Nanog. *Cell Stem Cell* **12**, 531-545,  
600 doi:10.1016/j.stem.2013.04.023 (2013).
- 601 29 Scholer, H. R., Ruppert, S., Suzuki, N., Chowdhury, K. & Gruss, P. New type  
602 of POU domain in germ line-specific protein Oct-4. *Nature* **344**, 435-439,  
603 doi:10.1038/344435a0 (1990).

- 604 30 Clark, A. T. *et al.* Human STELLAR, NANOG, and GDF3 genes are expressed  
605 in pluripotent cells and map to chromosome 12p13, a hotspot for  
606 teratocarcinoma. *Stem Cells* **22**, 169-179, doi:10.1634/stemcells.22-2-169  
607 (2004).
- 608 31 Palmqvist, L. *et al.* Correlation of murine embryonic stem cell gene  
609 expression profiles with functional measures of pluripotency. *Stem Cells*  
610 **23**, 663-680, doi:10.1634/stemcells.2004-0157 (2005).
- 611 32 Cross, J. C. *et al.* Hxt encodes a basic helix-loop-helix transcription factor  
612 that regulates trophoblast cell development. *Development* **121**, 2513-  
613 2523 (1995).
- 614 33 Emerson, J. A. Disruption of the cytokeratin filament network in the  
615 preimplantation mouse embryo. *Development* **104**, 219-234 (1988).
- 616 34 Baribault, H., Price, J., Miyai, K. & Oshima, R. G. Mid-gestational lethality in  
617 mice lacking keratin 8. *Genes Dev* **7**, 1191-1202,  
618 doi:10.1101/gad.7.7a.1191 (1993).
- 619 35 Home, P. *et al.* GATA3 is selectively expressed in the trophectoderm of  
620 peri-implantation embryo and directly regulates Cdx2 gene expression. *J*  
621 *Biol Chem* **284**, 28729-28737, doi:M109.016840 [pii]  
622 10.1074/jbc.M109.016840 (2009).
- 623 36 Lou, X., Kang, M., Xenopoulos, P., Munoz-Descalzo, S. & Hadjantonakis, A.  
624 K. A rapid and efficient 2D/3D nuclear segmentation method for analysis  
625 of early mouse embryo and stem cell image data. *Stem Cell Reports* **2**, 382-  
626 397, doi:10.1016/j.stemcr.2014.01.010 (2014).

- 627 37 van den Boom, V. *et al.* UTF1 is a chromatin-associated protein involved in  
628 ES cell differentiation. *J Cell Biol* **178**, 913-924,  
629 doi:10.1083/jcb.200702058 (2007).
- 630 38 Nishimoto, M., Fukushima, A., Okuda, A. & Muramatsu, M. The gene for the  
631 embryonic stem cell coactivator UTF1 carries a regulatory element which  
632 selectively interacts with a complex composed of Oct-3/4 and Sox-2. *Mol*  
633 *Cell Biol* **19**, 5453-5465 (1999).
- 634 39 Boroviak, T. *et al.* Single cell transcriptome analysis of human, marmoset  
635 and mouse embryos reveals common and divergent features of  
636 preimplantation development. *Development* **145**,  
637 doi:10.1242/dev.167833 (2018).
- 638 40 Okuda, A. *et al.* UTF1, a novel transcriptional coactivator expressed in  
639 pluripotent embryonic stem cells and extra-embryonic cells. *EMBO J* **17**,  
640 2019-2032, doi:10.1093/emboj/17.7.2019 (1998).
- 641 41 Kooistra, S. M., Thummer, R. P. & Eggen, B. J. Characterization of human  
642 UTF1, a chromatin-associated protein with repressor activity expressed  
643 in pluripotent cells. *Stem Cell Res* **2**, 211-218,  
644 doi:10.1016/j.scr.2009.02.001 (2009).
- 645 42 Niwa, H., Burdon, T., Chambers, I. & Smith, A. Self-renewal of pluripotent  
646 embryonic stem cells is mediated via activation of STAT3. *Genes Dev* **12**,  
647 2048-2060 (1998).
- 648 43 Do, D. V. *et al.* A genetic and developmental pathway from STAT3 to the  
649 OCT4-NANOG circuit is essential for maintenance of ICM lineages in vivo.  
650 *Genes Dev* **27**, 1378-1390, doi:10.1101/gad.221176.113 (2013).

- 651 44 Nichols, J., Chambers, I., Taga, T. & Smith, A. Physiological rationale for  
652 responsiveness of mouse embryonic stem cells to gp130 cytokines.  
653 *Development* **128**, 2333-2339. (2001).
- 654 45 Niwa, H., Ogawa, K., Shimosato, D. & Adachi, K. A parallel circuit of LIF  
655 signalling pathways maintains pluripotency of mouse ES cells. *Nature*  
656 **460**, 118-122, doi:nature08113 [pii]  
657 10.1038/nature08113 (2009).
- 658 46 Martello, G., Bertone, P. & Smith, A. Identification of the missing  
659 pluripotency mediator downstream of leukaemia inhibitory factor. *EMBO*  
660 *J* **32**, 2561-2574, doi:10.1038/emboj.2013.177 (2013).
- 661 47 Nicholson, S. E. *et al.* Suppressor of cytokine signaling-3 preferentially  
662 binds to the SHP-2-binding site on the shared cytokine receptor subunit  
663 gp130. *Proc Natl Acad Sci U S A* **97**, 6493-6498,  
664 doi:10.1073/pnas.100135197 (2000).
- 665 48 Artus, J., Piliszek, A. & Hadjantonakis, A. K. The primitive endoderm  
666 lineage of the mouse blastocyst: sequential transcription factor activation  
667 and regulation of differentiation by Sox17. *Dev Biol* **350**, 393-404,  
668 doi:S0012-1606(10)01248-0 [pii]  
669 10.1016/j.ydbio.2010.12.007 (2011).
- 670 49 Plusa, B., Piliszek, A., Frankenberg, S., Artus, J. & Hadjantonakis, A. K.  
671 Distinct sequential cell behaviours direct primitive endoderm formation  
672 in the mouse blastocyst. *Development* **135**, 3081-3091 (2008).
- 673 50 Chazaud, C., Yamanaka, Y., Pawson, T. & Rossant, J. Early lineage  
674 segregation between epiblast and primitive endoderm in mouse

- 675 blastocysts through the Grb2-MAPK pathway. *Dev Cell* **10**, 615-624,  
676 doi:S1534-5807(06)00125-0 [pii]  
677 10.1016/j.devcel.2006.02.020 (2006).
- 678 51 Feldman, B., Poueymirou, W., Papaioannou, V. E., DeChiara, T. M. &  
679 Goldfarb, M. Requirement of FGF-4 for postimplantation mouse  
680 development. *Science* **267**, 246-249 (1995).
- 681 52 Kang, M., Garg, V. & Hadjantonakis, A. K. Lineage Establishment and  
682 Progression within the Inner Cell Mass of the Mouse Blastocyst Requires  
683 FGFR1 and FGFR2. *Dev Cell* **41**, 496-510 e495,  
684 doi:10.1016/j.devcel.2017.05.003 (2017).
- 685 53 Molotkov, A., Mazot, P., Brewer, J. R., Cinalli, R. M. & Soriano, P. Distinct  
686 Requirements for FGFR1 and FGFR2 in Primitive Endoderm Development  
687 and Exit from Pluripotency. *Dev Cell* **41**, 511-526 e514,  
688 doi:10.1016/j.devcel.2017.05.004 (2017).
- 689 54 Parfitt, D. E. & Shen, M. M. From blastocyst to gastrula: gene regulatory  
690 networks of embryonic stem cells and early mouse embryogenesis. *Philos*  
691 *Trans R Soc Lond B Biol Sci* **369**, doi:10.1098/rstb.2013.0542 (2014).
- 692 55 Kang, M., Piliszek, A., Artus, J. & Hadjantonakis, A. K. FGF4 is required for  
693 lineage restriction and salt-and-pepper distribution of primitive  
694 endoderm factors but not their initial expression in the mouse.  
695 *Development* **140**, 267-279, doi:10.1242/dev.084996 (2013).
- 696 56 Donnison, M. *et al.* Loss of the extraembryonic ectoderm in Elf5 mutants  
697 leads to defects in embryonic patterning. *Development* **132**, 2299-2308,  
698 doi:dev.01819 [pii]  
699 10.1242/dev.01819 (2005).

- 700 57 Pettersson, K. *et al.* Expression of a novel member of estrogen response  
701 element-binding nuclear receptors is restricted to the early stages of  
702 chorion formation during mouse embryogenesis. *Mech Dev* **54**, 211-223,  
703 doi:0925477395004793 [pii] (1996).
- 704 58 Cormier, S., Vandormael-Pournin, S., Babinet, C. & Cohen-Tannoudji, M.  
705 Developmental expression of the Notch signaling pathway genes during  
706 mouse preimplantation development. *Gene Expr Patterns* **4**, 713-717,  
707 doi:10.1016/j.modgep.2004.04.003 (2004).
- 708 59 Ma, G. T. *et al.* GATA-2 and GATA-3 regulate trophoblast-specific gene  
709 expression in vivo. *Development* **124**, 907-914 (1997).
- 710 60 Rayon, T. *et al.* Notch and hippo converge on Cdx2 to specify the  
711 trophoctoderm lineage in the mouse blastocyst. *Dev Cell* **30**, 410-422,  
712 doi:10.1016/j.devcel.2014.06.019 (2014).
- 713 61 Deng, Q., Ramskold, D., Reinius, B. & Sandberg, R. Single-cell RNA-seq  
714 reveals dynamic, random monoallelic gene expression in mammalian  
715 cells. *Science* **343**, 193-196, doi:10.1126/science.1245316 (2014).
- 716 62 Gong, T. & Szustakowski, J. D. DeconRNASeq: a statistical framework for  
717 deconvolution of heterogeneous tissue samples based on mRNA-Seq data.  
718 *Bioinformatics* **29**, 1083-1085, doi:10.1093/bioinformatics/btt090  
719 (2013).
- 720 63 Blakeley, P. *et al.* Defining the three cell lineages of the human blastocyst  
721 by single-cell RNA-seq. *Development* **142**, 3151-3165,  
722 doi:10.1242/dev.123547 (2015).



- 723 64 Song, G. X. *et al.* Overexpression of FABP3 promotes apoptosis through  
724 inducing mitochondrial impairment in embryonic cancer cells. *J Cell*  
725 *Biochem* **113**, 3701-3708, doi:10.1002/jcb.24243 (2012).
- 726 65 Guo, G. *et al.* Resolution of cell fate decisions revealed by single-cell gene  
727 expression analysis from zygote to blastocyst. *Dev Cell* **18**, 675-685,  
728 doi:S1534-5807(10)00110-3 [pii]  
729 10.1016/j.devcel.2010.02.012 (2010).
- 730 66 Islam, A. *et al.* Fatty Acid Binding Protein 3 Is Involved in n-3 and n-6  
731 PUFA transport in mouse trophoblasts. *J Nutr* **144**, 1509-1516,  
732 doi:10.3945/jn.114.197202 (2014).
- 733 67 Moriwaki, K., Tsukita, S. & Furuse, M. Tight junctions containing claudin 4  
734 and 6 are essential for blastocyst formation in preimplantation mouse  
735 embryos. *Dev Biol* **312**, 509-522, doi:10.1016/j.ydbio.2007.09.049  
736 (2007).
- 737 68 Hirate, Y. *et al.* Polarity-dependent distribution of angiomin 1 localizes  
738 Hippo signaling in preimplantation embryos. *Curr Biol* **23**, 1181-1194,  
739 doi:10.1016/j.cub.2013.05.014  
740 S0960-9822(13)00577-0 [pii] (2013).
- 741 69 Wu, S., Huang, J., Dong, J. & Pan, D. hippo encodes a Ste-20 family protein  
742 kinase that restricts cell proliferation and promotes apoptosis in  
743 conjunction with salvador and warts. *Cell* **114**, 445-456,  
744 doi:10.1016/s0092-8674(03)00549-x (2003).
- 745 70 Hildebrand, S. *et al.* The E-cadherin/AmotL2 complex organizes actin  
746 filaments required for epithelial hexagonal packing and blastocyst  
747 hatching. *Sci Rep* **7**, 9540, doi:10.1038/s41598-017-10102-w (2017).

- 748 71 Moussaieff, A. *et al.* Glycolysis-mediated changes in acetyl-CoA and  
749 histone acetylation control the early differentiation of embryonic stem  
750 cells. *Cell Metab* **21**, 392-402, doi:10.1016/j.cmet.2015.02.002 (2015).
- 751 72 Kim, H. *et al.* Core Pluripotency Factors Directly Regulate Metabolism in  
752 Embryonic Stem Cell to Maintain Pluripotency. *Stem Cells* **33**, 2699-2711,  
753 doi:10.1002/stem.2073 (2015).
- 754 73 Jaishy, B. & Abel, E. D. Lipids, lysosomes, and autophagy. *J Lipid Res* **57**,  
755 1619-1635, doi:10.1194/jlr.R067520 (2016).
- 756 74 Settembre, C. *et al.* TFEB links autophagy to lysosomal biogenesis. *Science*  
757 **332**, 1429-1433, doi:10.1126/science.1204592 (2011).
- 758 75 Peterson, T. R. *et al.* DEPTOR is an mTOR inhibitor frequently  
759 overexpressed in multiple myeloma cells and required for their survival.  
760 *Cell* **137**, 873-886, doi:10.1016/j.cell.2009.03.046 (2009).
- 761 76 Boroviak, T., Loos, R., Bertone, P., Smith, A. & Nichols, J. The ability of  
762 inner-cell-mass cells to self-renew as embryonic stem cells is acquired  
763 following epiblast specification. *Nat Cell Biol* **16**, 516-528,  
764 doi:10.1038/ncb2965 (2014).
- 765 77 Yoshida, K. *et al.* Maintenance of the pluripotential phenotype of  
766 embryonic stem cells through direct activation of gp130 signalling  
767 pathways. *Mech. Dev.* **45**, 163-171 (1994).
- 768 78 Wells, N. *et al.* The geometric control of E14 and R1 mouse embryonic  
769 stem cell pluripotency by plasma polymer surface chemical gradients.  
770 *Biomaterials* **30**, 1066-1070, doi:10.1016/j.biomaterials.2008.10.027  
771 (2009).

772 79 Carbognin, E., Betto, R. M., Soriano, M. E., Smith, A. G. & Martello, G. Stat3  
773 promotes mitochondrial transcription and oxidative respiration during  
774 maintenance and induction of naive pluripotency. *EMBO J* **35**, 618-634,  
775 doi:10.15252/embj.201592629 (2016).

776

777

778

779

780

781

782

783

784

785

786

787

788

789

790

791

792

793

794

795

796

## 797 **Materials and Methods**

798 Experiments were performed in accordance with EU guidelines for the care  
799 and use of laboratory animals and under the authority of appropriate UK  
800 governmental legislation. Use of animals in this project was approved by the  
801 Animal Welfare and Ethical Review Body for the University of Cambridge and  
802 relevant Home Office licences are in place.

803

## 804 **Mice and husbandry**

805 All embryos were generated from transgenic mouse strains with mixed  
806 genetic backgrounds. They were: Oct4<sup>+/-1</sup>, ZP3CreTg<sup>/+2</sup>, R26::CreERT2<sup>3</sup> and  
807 Oct4<sup>LoxP/LoxP4</sup>. Compound transgenic mice were generated from crosses of  
808 these lines. Genotyping was performed by PCR analysis using DNA extracted  
809 from ear biopsies or trophectoderm lysate following isolation of ICMs by  
810 immunosurgery<sup>1,5</sup>. Primer sequences are as follows:

811 Oct4LoxP: CTCAAACCCCAGGTGATCTTCAAAC;

812 GGATCCCATGCCCTCTTCTGGT

813 Oct4 null: GCCTTCCTCTATAGGTTGGGCTCCAACC;

814 GGGCTGACCGCTTCCTCGTGCTTTACG;

815 GAGCTTATGATCTGATGTCCATCTCTGTGC

816 Cre transgene: GCGGTCTGGCAGTAAAACTATC;

817 GTGAAACAGCATTGCTGTCCTT

818 Amplification was carried out on around 5 µL of lysate for 35 cycles (following  
819 95°C hot start for 10 minutes) of 94°C, 15 seconds; 60°C, 12 seconds; 72°C,  
820 60 seconds, with a final extension at 72°C for 10 minutes. Reaction products  
821 were resolved by agarose gel electrophoresis. Mice were maintained on a

822 lighting regime of 14:10 hours light:dark with food and water supplied *ad*  
823 *libitum*. Embryos for RNAseq were generated from Oct4<sup>+/-</sup> *inter se* natural  
824 mating; those for IHC were compound transgenics derived from Oct4<sup>LoxP/-</sup>;  
825 ZP3Cre<sup>Tg/+</sup> stud males and Oct4<sup>LoxP/LoxP</sup> dams. Detection of a copulation plug  
826 following natural mating indicated embryonic day (E) 0.5. Embryos were  
827 isolated in M2 medium (Sigma) at E3.5 or E4.5.

828

### 829 **ESCs and culture**

830 Indole-3-acetic acid (IAA, Sigma) inducible Oct4 deletable induced pluripotent  
831 stem cells (iPSC) were kindly provided by Lawrence Bates. Neural stem cells  
832 (NSCs) derived from brains of E13.5 Oct4<sup>fl/-</sup> Rosa26::CreER embryos, as  
833 previously reported<sup>6</sup> were treated with 500 nM 4-hydroxytamoxifen to induce  
834 deletion of the floxed *Oct4* allele. Oct4<sup>-/-</sup> NSCs were transduced with  
835 retroviral Oct4, Klf4 and cMyc. Retroviruses were produced in PLAT-E cells;  
836 briefly, cells were transfected with pMXs-Oct3/4, pMXs-Klf4 and pMXs-cMyc  
837 using FuGENE 6 reagent (Promega). Polybrene (Sigma) was added to a final  
838 concentration of 4 µg/ml. 24 hours later NSCs were nucleofected with pPB-  
839 CAG-Oct4AID-PGK-hygro (Piggybac transposon containing a constitutive  
840 Oct4AID fusion protein expression cassette and a constitutive hygromycin  
841 resistance expression cassette), pPB-CAG-Tir1-IRES-bsd (Piggybac  
842 transposon containing a constitutive Tir1 IRES blasticidin resistance  
843 expression cassette) and pPBase (a non-integrating Piggybac transposase  
844 expression vector) using Amaxa Nucleofection Technology (Lonza AG)  
845 according to the manufacturer's instructions. Program T-020 was used for  
846 NSC nucleofections. Cells were plated in NSC medium for 2 days then

847 switched to medium (GMEM [Sigma] containing 10% FCS [Sigma], 1× NEAA  
848 [PAA], 1× penicillin/streptomycin [PAA], 1 mM sodium pyruvate [PAA], 0.1 mM  
849 2-mercaptoethanol [Gibco] and 2 mM L-glutamine [Gibco], supplemented with  
850 20 ng/ml LIF). Medium was switched to KSR medium (GMEM containing 10%  
851 KSR [Invitrogen], 1% FCS, 1× NEAA, 1× penicillin/streptomycin, 1 mM sodium  
852 pyruvate, 0.1 mM 2-mercaptoethanol, 2 mM L-glutamine) supplemented with  
853 2iL (20 ng/ml LIF, 3 μM CHIR99021 [CHIR], and 1 μM PD0325901 [PD03]),  
854 and selection was added for expression of the endogenous (floxed) Oct4  
855 locus on the ninth day in KSR-2iL. Expanded colonies were passaged into  
856 N2B27 + 2iL. 0.8 μg of pPB-CAG-GFP-IRES Zeocin (gift from Masaki  
857 Kinoshita) and 0.4 μg of pPy-CAG Pbase were transfected into IAA inducible  
858 Oct4 deletable iPSCs using lipofectamine 2000 (Thermo Fisher Scientific).  
859 The transfected cells were picked after selection with Zeocin (100mg/ml) and  
860 expanded. The resulting iPSCs were routinely maintained on 0.1% gelatin  
861 (Sigma)-coated 6-well plates (Falcon) in N2B27 + 2iL and passaged every  
862 three days following dissociation with Accutase.

863

#### 864 **Cell differentiation**

865 IAA inducibly deletable Oct4 cells were seeded ( $1.5 \times 10^4$ ) on fibronectin-  
866 coated (12.5μg/ml; Millipore) Ibidi-dishes (μ-Dish, 35mm) and cultured in  
867 N2B27 + 2iL for one day. The next day, medium was switched to N2B27 +  
868 100U/ml LIF, 3 μM CHIR and 500 μM IAA for Oct4 deletion (or 0.1% ethanol  
869 for controls) and cells were cultured for another day.

870

871

872 **Immunohistochemistry**

873 **Embryos**

874 The zona pellucida was removed from all non-hatched embryos using acid  
875 tyrodes solution (Sigma). Embryos were fixed in 4% PFA (paraformaldehyde;  
876 Thermo Fisher Scientific) in PBS at room temperature for 15 minutes. After  
877 rinsing in PBS/PVP (3mg/ml PVP in PBS) they were permeabilised in 0.25%  
878 Triton X (Sigma) in PBS/PVP for 30 minutes, then incubated in 2% donkey  
879 serum, 0.1% BSA and 0.01% Tween 20 in PBS (blocking buffer) for at least  
880 15 minutes and incubated overnight at 4°C in primary antibodies diluted in  
881 blocking buffer (Suppl.Table 7). After 3 x 15 min washes in blocking buffer  
882 they were incubated at room temperature in the dark in secondary antibody  
883 (Alexa dye, Life Sciences) and DAPI (4',6-diamidino-2-phenylindole/  
884 Invitrogen) 1:500 in blocking solution. After 3 x 15 minute washes, the  
885 embryos were taken through 25%, 50%, 75% then 100% VectaShield  
886 mounting medium (Vector Laboratories) in blocking solution. The embryos  
887 were placed in a drop of Vectashield on coverslips and surrounded by spots  
888 of Vaseline on which the upper coverslip was gently pressed. To avoid drying  
889 out the coverslip was surrounded by nail polish. Images were acquired using  
890 a Leica TCS SP5 confocal microscope.

891

892 **Cells**

893 Oct4-deleted and control ESCs were fixed with 4% PFA in PBS at room  
894 temperature for 15 minutes, then rinsed in PBS and blocked in PBS  
895 containing 3% donkey serum (Sigma), 0.1%TritonX at 4°C for 2-3 hours.  
896 Primary antibodies (Suppl.Table 7) were diluted in blocking buffer, and

897 samples were incubated in the appropriate antibody solution at 4°C overnight.  
898 They were rinsed three times in PBST, comprising PBS + 0.1% TritonX, for  
899 15 minutes each. Secondary antibodies were diluted in blocking buffer with or  
900 without 500 ng/ml DAPI and samples were incubated in the appropriate  
901 secondary antibody solution at room temperature for 1 hour in the dark. They  
902 were rinsed three times in PBST for 15 minutes each, then stored in PBS at  
903 4°C in the dark until imaging.

904

### 905 **Imaging**

906 Samples were observed using a spinning disk microscope (Andor Revolution  
907 XD System with a Nikon Eclipse Ti Spinning Disk) or a Leica TCS Sp5  
908 confocal. 40x objective lens was used with Type F immersion liquid. The  
909 images were analysed by Fiji as described previously<sup>7</sup>.

910

### 911 **Preparation of samples for RNA-sequencing**

912 For E3.5 blastocysts, zona pellucidae were removed using acid tyrode's  
913 solution (Sigma) and embryos subjected to immunosurgery<sup>1,5</sup> using 20% anti-  
914 mouse whole antiserum (Sigma) in N2B27 in at 37°C, 7% CO<sub>2</sub> for 30 minutes,  
915 followed by 3 rinses in M2, then 15 minutes in 20% non-heat inactivated rat  
916 serum (made in house) in N2B27 in at 37°C, 7% CO<sub>2</sub>. After 30 minutes in  
917 fresh N2B27 lysed trophectoderm was removed and placed in lysis buffer for  
918 genotyping. ICMs were incubated in 0.025% trypsin (Invitrogen) plus 1% chick  
919 serum (Sigma) for 5-10 minutes in small drops and dissociated by repetitive  
920 pipetting using a small diameter mouth-controlled flame-pulled Pasteur  
921 pipette. Individual ICM cells were transferred into single cell lysis buffer and



922 snap frozen on dry ice. Smart-seq2 libraries were prepared as described  
923 previously<sup>8</sup> and sequenced on the Illumina platform in a 125 bp paired-end  
924 format.

925

### 926 **RNA-seq data processing**

927 Early/mid and late blastocyst annotated cell data was downloaded from  
928 GSE45719 and selected only cells expressing trophectoderm markers<sup>9</sup>.  
929 Genome build GRCm38/mm10 and STAR 2.5.2a<sup>10</sup> were used for aligning  
930 reads and ensembl release 87<sup>11</sup> was used to guide gene annotation. After  
931 removal of inadequate samples according to filtering criteria described<sup>12</sup>, we  
932 quantified alignments to gene loci with htseq-count<sup>13</sup> based on annotation  
933 from Ensembl 87.

934

### 935 **Transcriptome analysis**

936 Principal component and cluster analyses were performed based on  
937 log<sub>2</sub>FPKM values computed with custom scripts, in addition to the  
938 Bioconductor packages *DESeq*<sup>14</sup> or *FactoMineR*. Diffusion maps and T-  
939 distributed stochastic neighbor embedding (t-SNE) were produced with  
940 *destiny*<sup>15</sup> and *Rtsne* packages.  
941 Default parameters were used unless otherwise indicated. Differential  
942 expression analysis was performed with *Single Cell Differential Expression R*  
943 *package*, *scde*<sup>16</sup>, which has the advantage of fitting individual error models for  
944 the assessment of differential expression between sample groups. For global  
945 analyses, we considered only genes with FPKM > 0 in at least one condition,  
946 not expressed genes were always omitted. Euclidean distance and average

947 agglomeration methods were used for cluster analyses unless otherwise  
948 indicated. Expression data are made available in Supplemental Tables and  
949 through a web application to visualise transcription expression and fitted curve  
950 with temporal pseudotime of individual genes in embryonic lineages  
951 (<https://giulianostirparo.shinyapps.io/pou5f1/>). High variable genes across  
952 cells were computed according to the methods described<sup>12,17</sup>. A non-linear  
953 regression curve was fitted between average  $\log_2$  FPKM and the square of  
954 coefficient of variation ( $\log CV_2$ ); then, specific thresholds were applied along  
955 the x-axis (average  $\log_2$  FPKM) and y-axis ( $\log CV_2$ ) to identify the most  
956 variable genes.

957 To assess the accuracy of the identified lineages, we used the Weighted  
958 Gene Co-Expression Network Analysis unsupervised clustering method  
959 (WGCNA<sup>18</sup> to identify specific modules of co-expressed genes in each  
960 developmental lineage/genotype. R package ggtern was used to compute and  
961 visualize ternary plots. Kyoto Encyclopedia of Genes and Genomes (KEGG)  
962 was used to compute pathway enrichment and to download genes in  
963 glycolysis/gluconeogenesis and tricarboxylic acid cycle pathways.

964

### 965 **Quadratic programming**

966 Fractional identity between pre-implantation stages was computed using R  
967 package DeconRNASeq<sup>19</sup>. This package uses quadratic programming  
968 computation to estimate the proportion of distinctive types of tissue. The  
969 average expression of pre-implantation stages (E4.5 WT/HET epiblast and  
970 primitive endoderm, E4.5 MUT cells) were used as “signature” dataset.

971 Finally, the fraction of identity between TE cells and the “signature” dataset  
972 was computed using the overlapping gene expression data (FPKM > 0).

### 973 **Data availability**

974 GEO submission

975

### 976 **Code availability**

977 Code is available upon request

978

### 979 **References**

980 1 Nichols, J. *et al.* Formation of pluripotent stem cells in the mammalian  
981 embryo depends on the POU transcription factor Oct4. *Cell* **95**, 379-  
982 391 (1998).

983 2 Lewandoski, M., Wassarman, K. M. & Martin, G. R. Zp3-cre, a  
984 transgenic mouse line for the activation or inactivation of loxP-flanked  
985 target genes specifically in the female germ line. *Curr Biol* **7**, 148-151  
986 (1997).

987 3 Vooijs, M., Jonkers, J. & Berns, A. A highly efficient ligand-regulated  
988 Cre recombinase mouse line shows that LoxP recombination is  
989 position dependent. *EMBO Rep* **2**, 292-297, doi:10.1093/embo-  
990 reports/kve064  
991 2/4/292 [pii] (2001).

992 4 Le Bin, G. C. *et al.* Oct4 is required for lineage priming in the  
993 developing inner cell mass of the mouse blastocyst. *Development* **141**,  
994 1001-1010, doi:10.1242/dev.096875  
995 dev.096875 [pii] (2014).

- 996 5 Solter, D. & Knowles, B. Immunosurgery of mouse blastocyst. *PNAS*  
997 **72**, 5099-5102 (1975).
- 998 6 Conti, L. *et al.* Niche-independent symmetrical self-renewal of a  
999 mammalian tissue stem cell. *PLoS Biol* **3**, e283 (2005).
- 1000 7 Lou, X., Kang, M., Xenopoulos, P., Munoz-Descalzo, S. &  
1001 Hadjantonakis, A. K. A rapid and efficient 2D/3D nuclear segmentation  
1002 method for analysis of early mouse embryo and stem cell image data.  
1003 *Stem Cell Reports* **2**, 382-397, doi:10.1016/j.stemcr.2014.01.010  
1004 (2014).
- 1005 8 Picelli, S., Faridani, O. R., Björklund, A. K., Winberg, G., Sagasser, S.  
1006 and Sandberg, R. Full-length RNA-seq from single cells using Smart-  
1007 seq2. *Nature Protocols* **9**, 171-181, doi:10.1038/nprot.2014.006 (2014).
- 1008 9 Blakeley, P. *et al.* Defining the three cell lineages of the human  
1009 blastocyst by single-cell RNA-seq. *Development* **142**, 3151-3165,  
1010 doi:10.1242/dev.123547 (2015).
- 1011 10 Dobin, A. *et al.* STAR: ultrafast universal RNA-seq aligner.  
1012 *Bioinformatics* **29**, 15-21, doi:10.1093/bioinformatics/bts635 (2013).
- 1013 11 Yates, A. *et al.* Ensembl 2016. *Nucleic Acids Res* **44**, D710-716,  
1014 doi:10.1093/nar/gkv1157 (2016).
- 1015 12 Stirparo, G. G. *et al.* Integrated analysis of single-cell embryo data  
1016 yields a unified transcriptome signature for the human pre-implantation  
1017 epiblast. *Development* **145**, doi:10.1242/dev.158501 (2018).
- 1018 13 Anders, S., Pyl, P. T. & Huber, W. HTSeq--a Python framework to work  
1019 with high-throughput sequencing data. *Bioinformatics* **31**, 166-169,  
1020 doi:10.1093/bioinformatics/btu638 (2015).

- 1021 14 Anders, S. & Huber, W. Differential expression analysis for sequence  
1022 count data. *Genome Biol* **11**, R106, doi:10.1186/gb-2010-11-10-r106  
1023 (2010).
- 1024 15 Angerer, P. *et al.* destiny: diffusion maps for large-scale single-cell data  
1025 in R. *Bioinformatics* **32**, 1241-1243, doi:10.1093/bioinformatics/btv715  
1026 (2016).
- 1027 16 Kharchenko, P. V., Silberstein, L. & Scadden, D. T. Bayesian approach  
1028 to single-cell differential expression analysis. *Nat Methods* **11**, 740-742,  
1029 doi:10.1038/nmeth.2967 (2014).
- 1030 17 Boroviak, T. *et al.* Single cell transcriptome analysis of human,  
1031 marmoset and mouse embryos reveals common and divergent  
1032 features of preimplantation development. *Development* **145**,  
1033 doi:10.1242/dev.167833 (2018).
- 1034 18 Langfelder, P. & Horvath, S. WGCNA: an R package for weighted  
1035 correlation network analysis. *BMC Bioinformatics* **9**, 559,  
1036 doi:10.1186/1471-2105-9-559 (2008).
- 1037 19 Gong, T. & Szustakowski, J. D. DeconRNASeq: a statistical framework  
1038 for deconvolution of heterogeneous tissue samples based on mRNA-  
1039 Seq data. *Bioinformatics* **29**, 1083-1085,  
1040 doi:10.1093/bioinformatics/btt090 (2013).
- 1041
- 1042

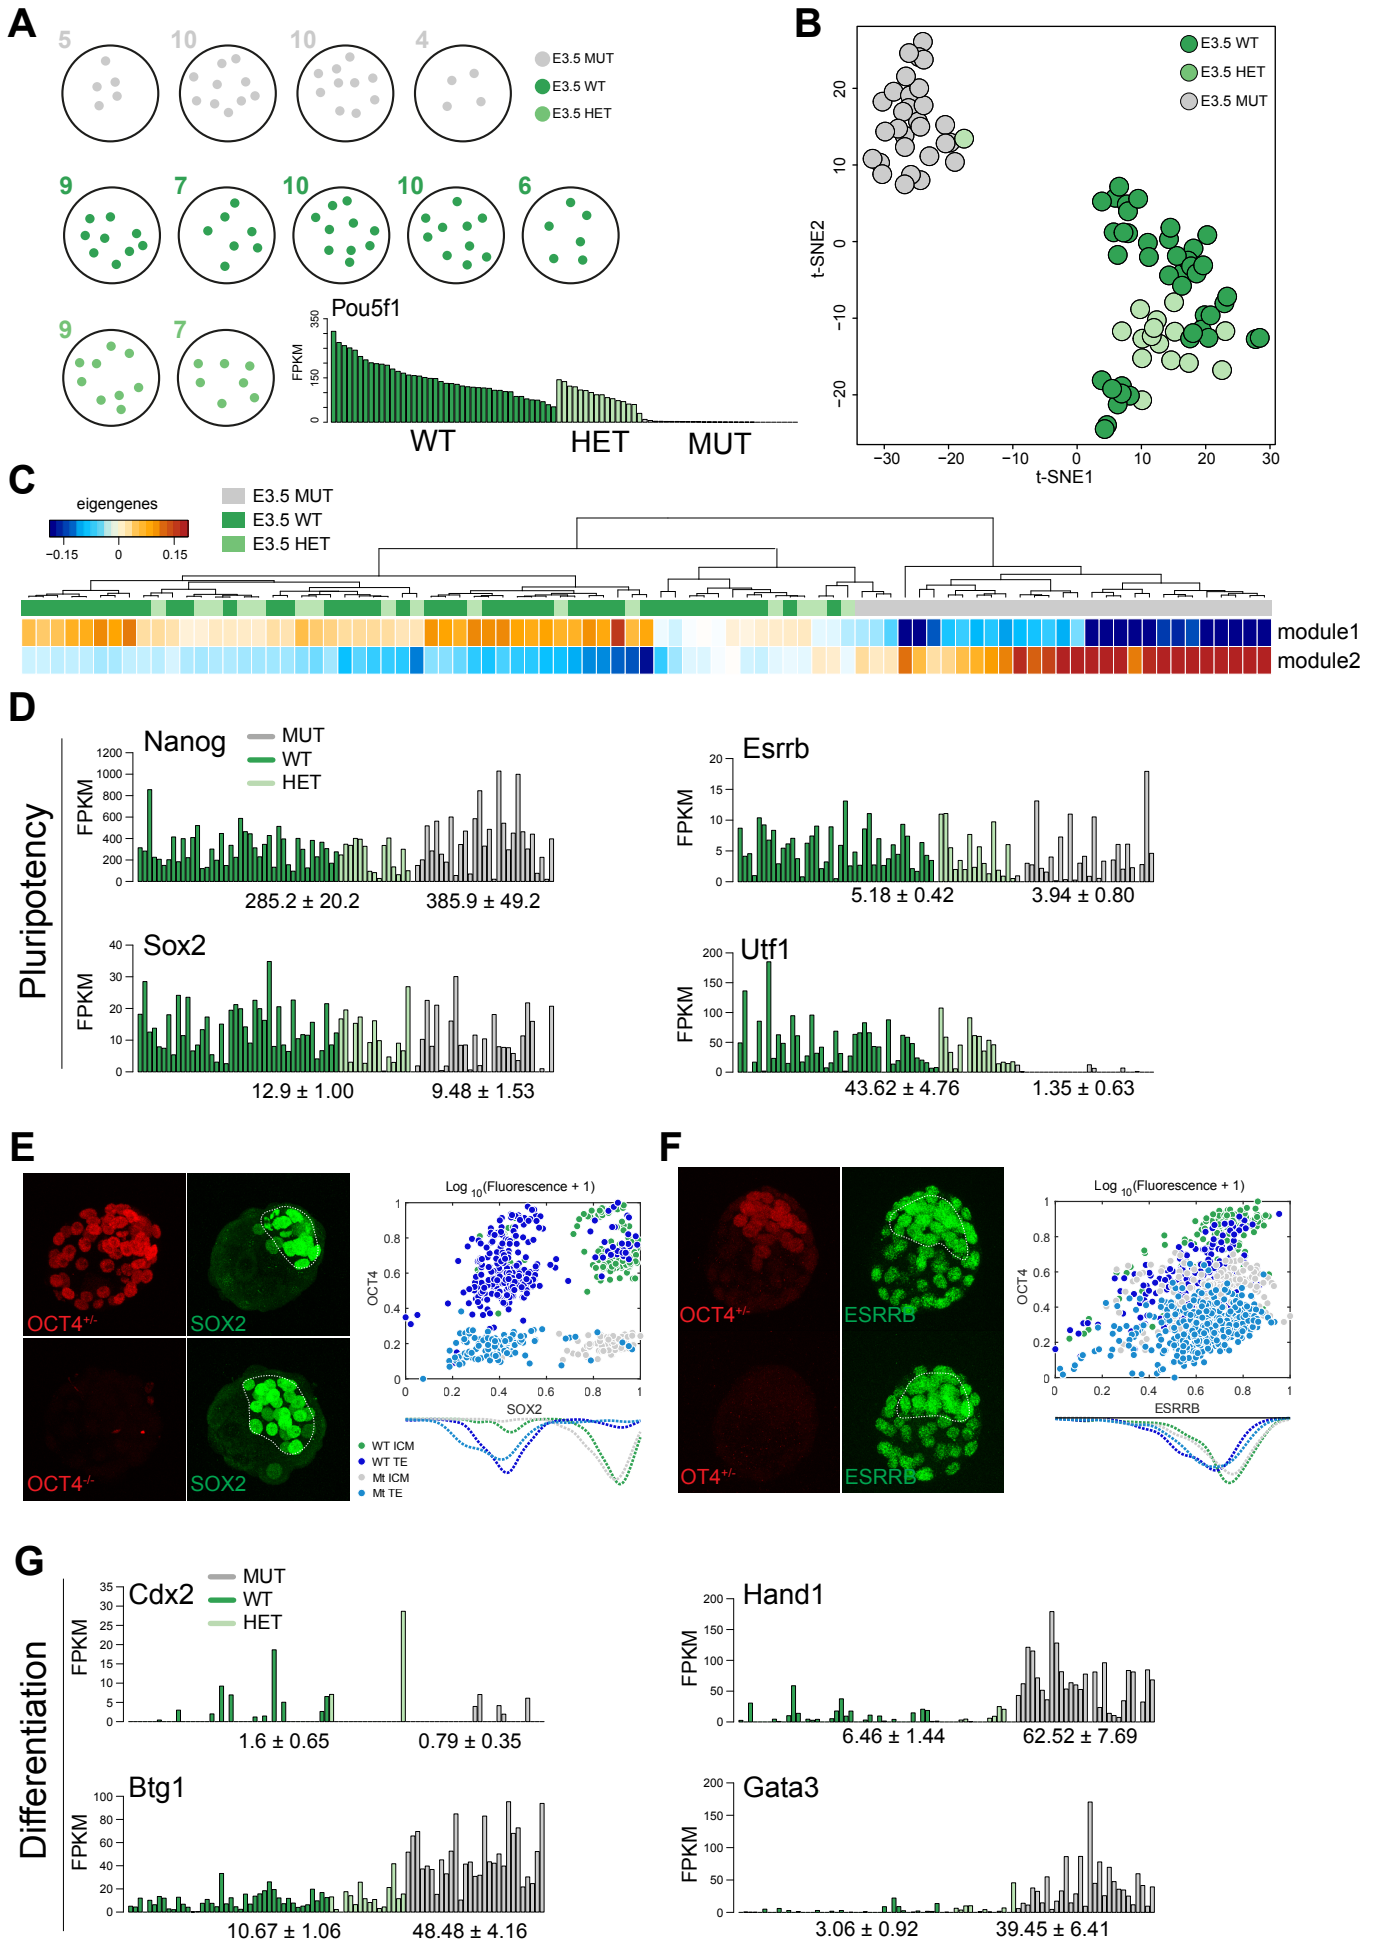

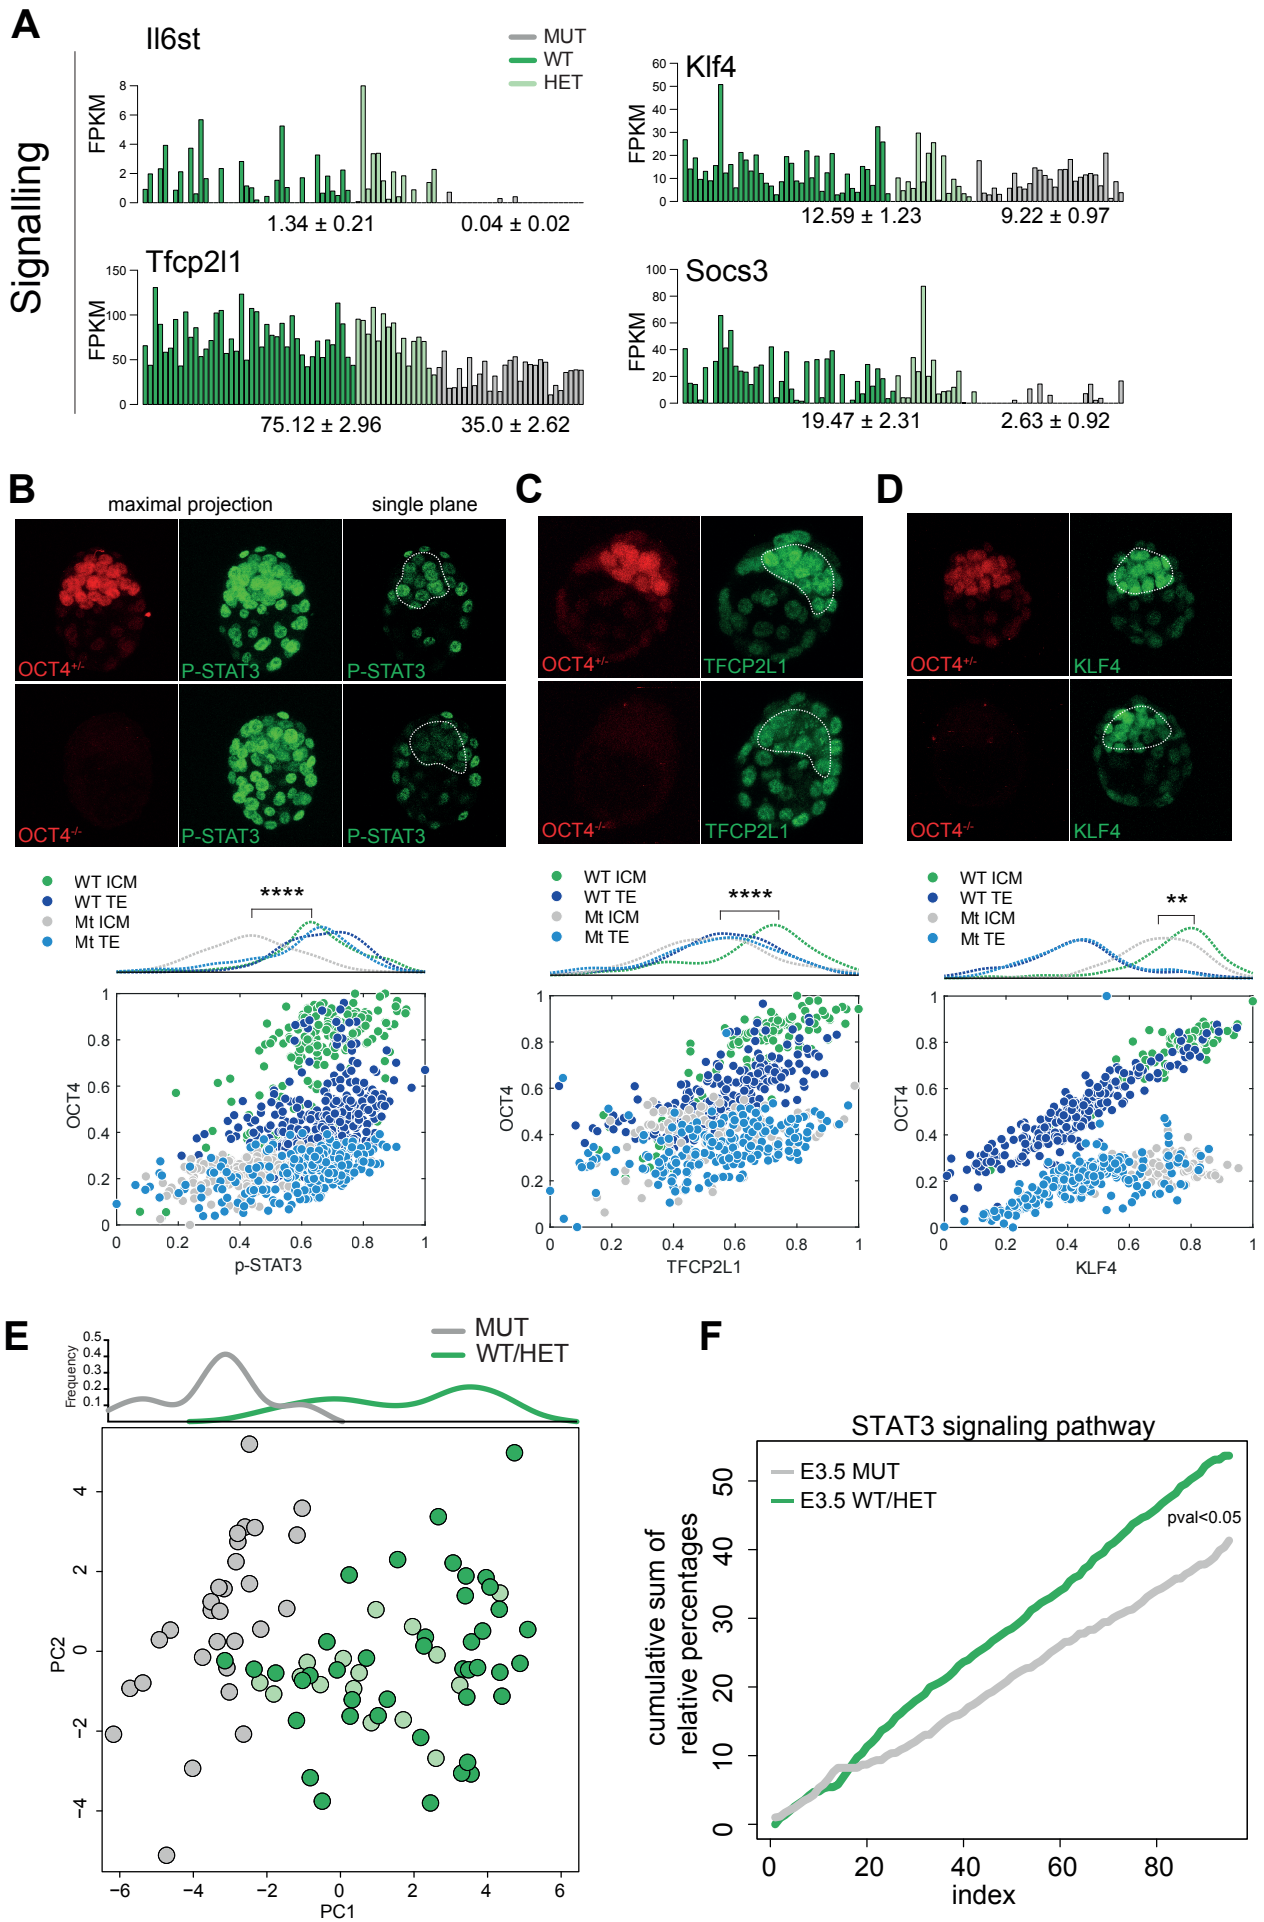

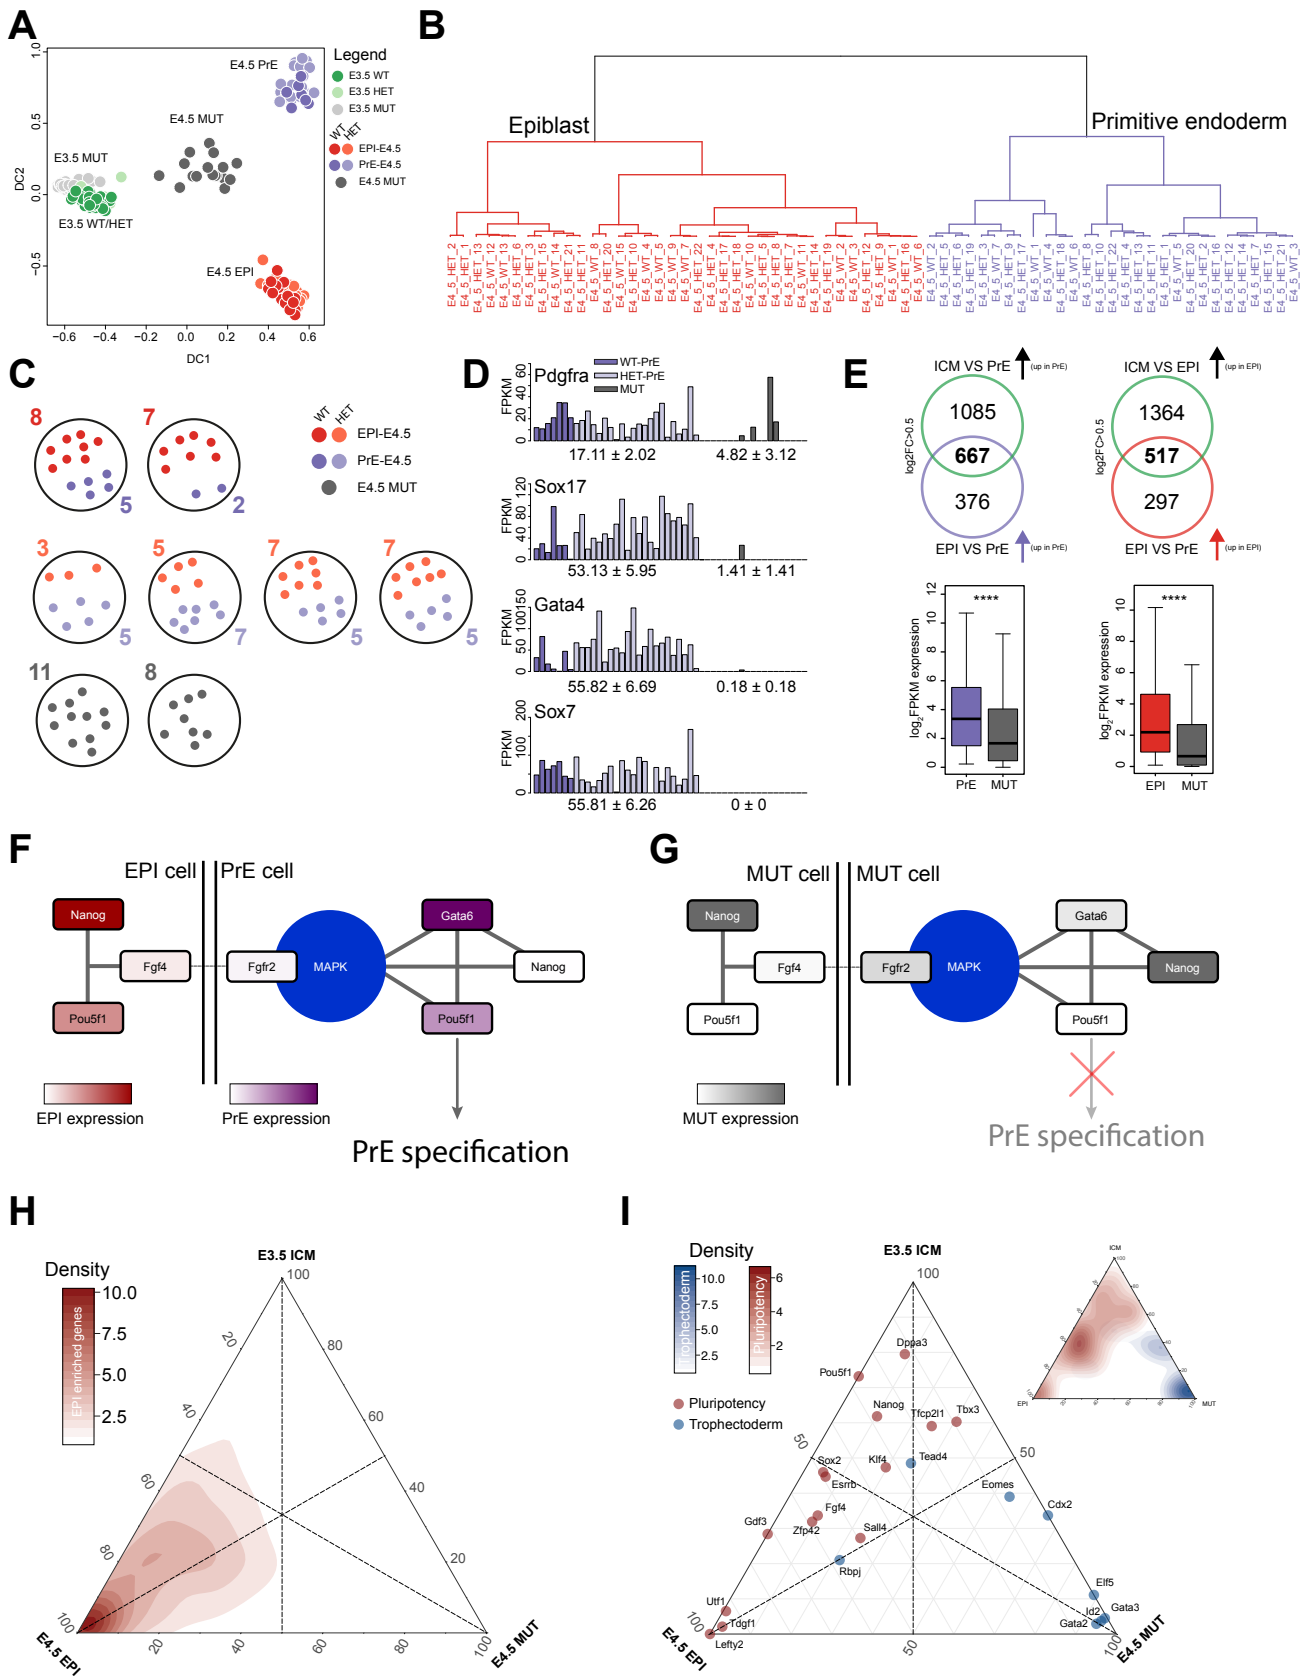



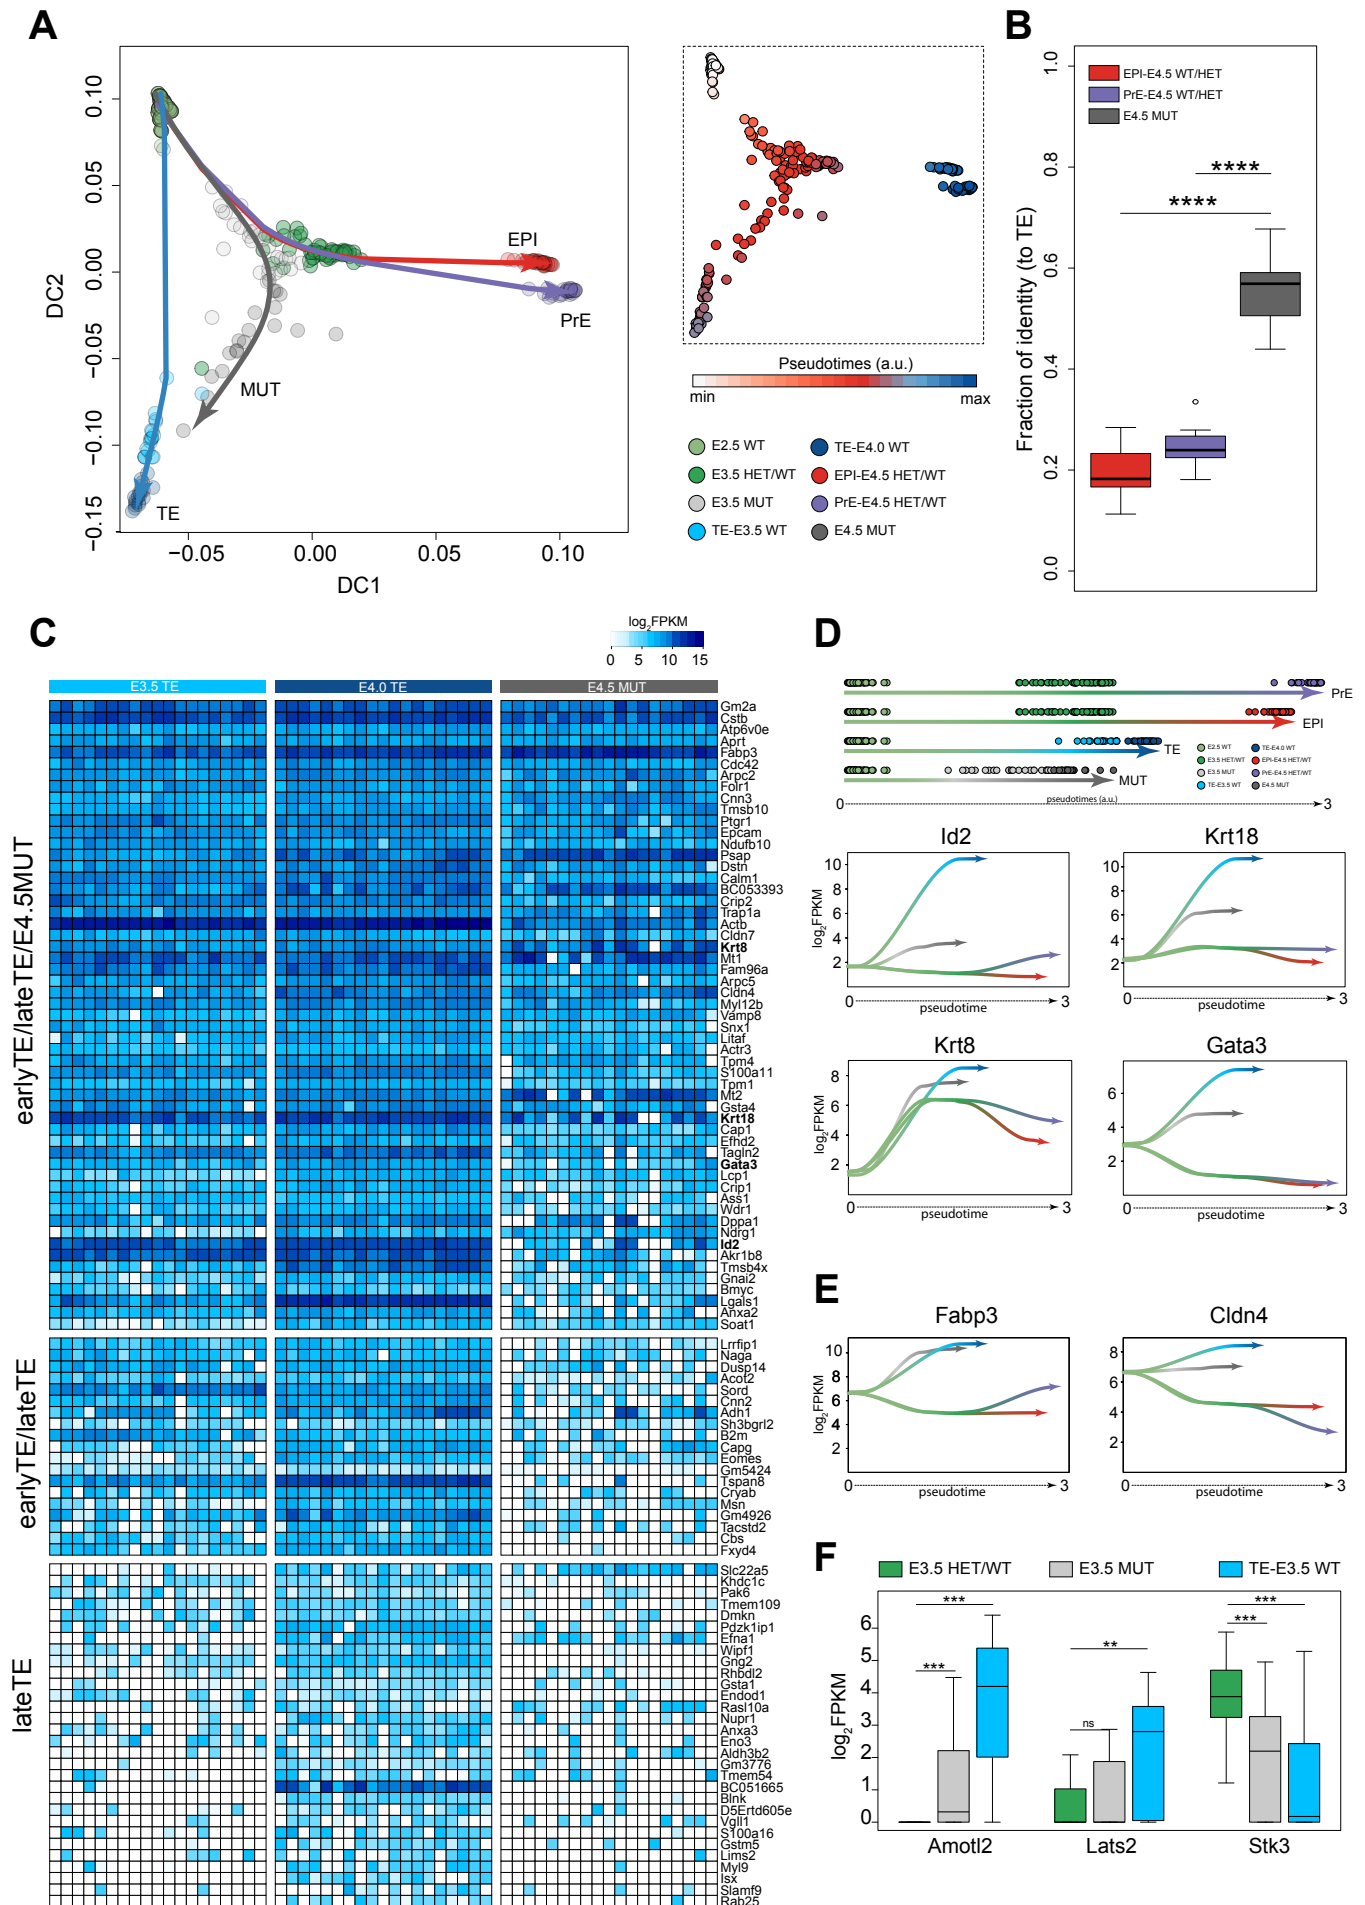



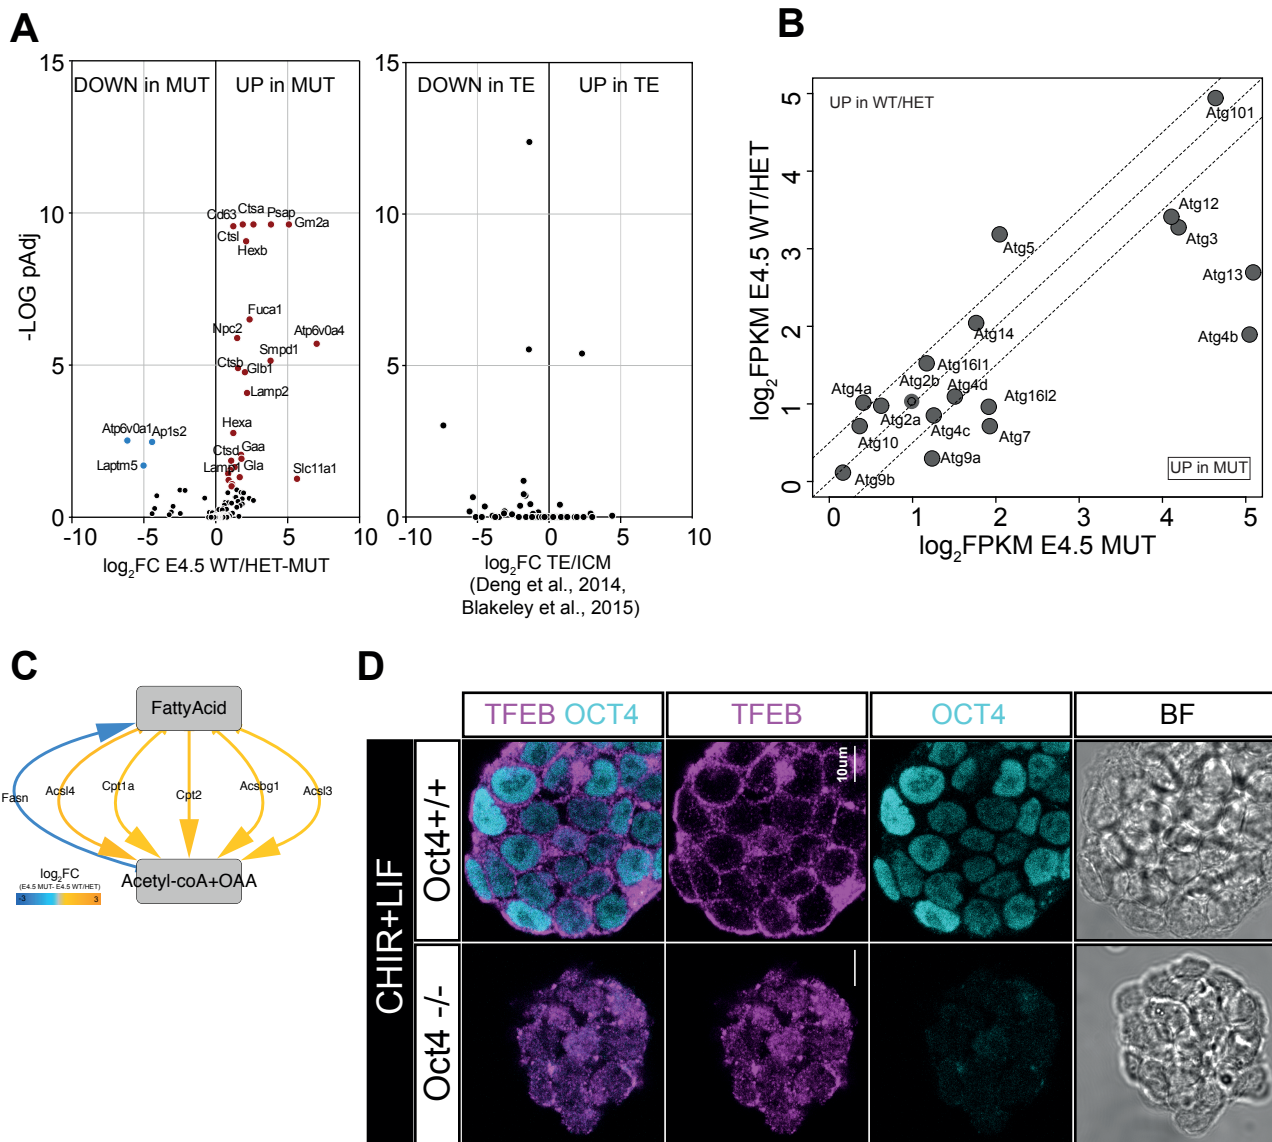



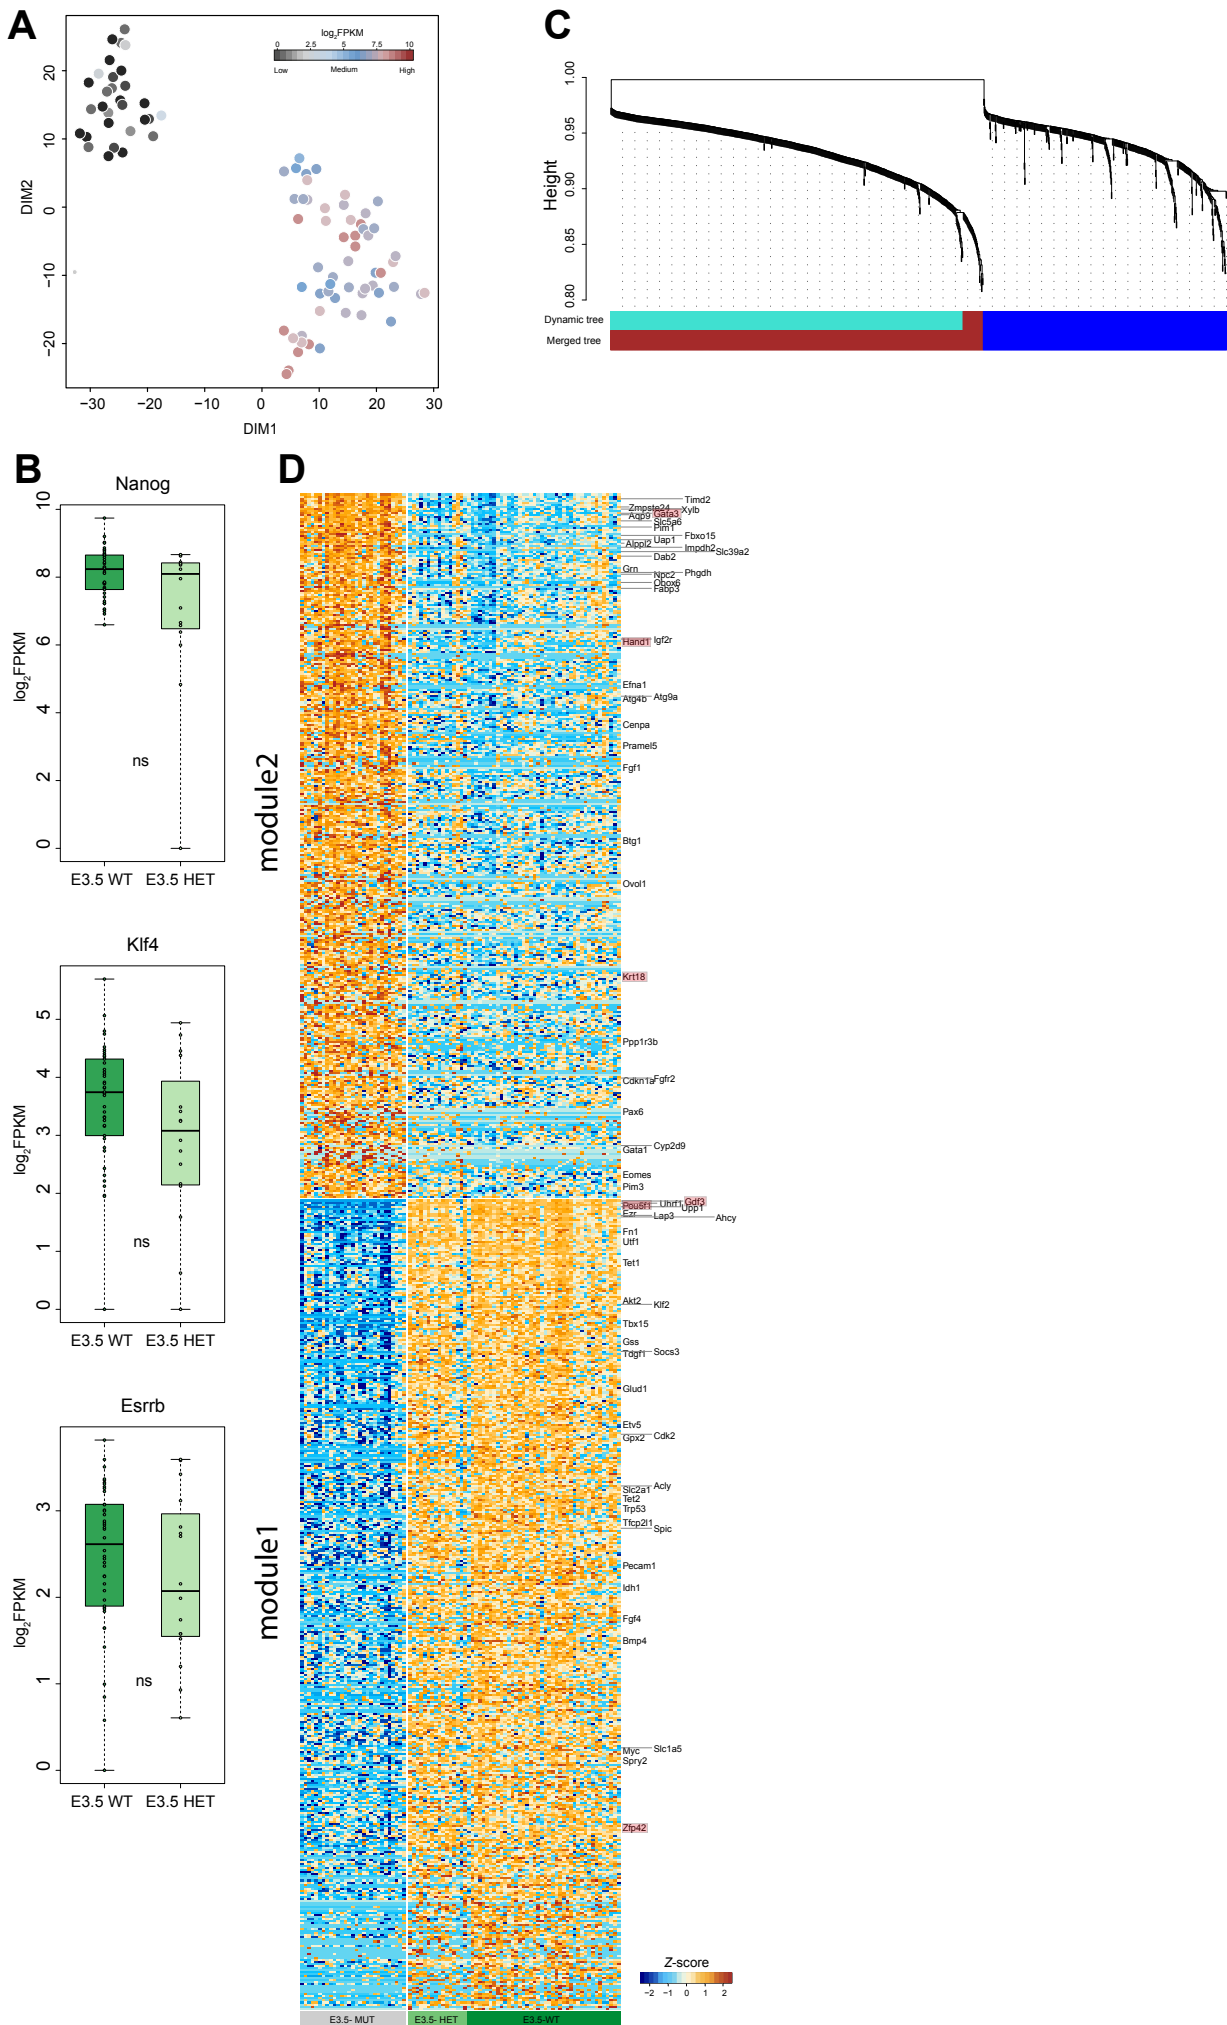

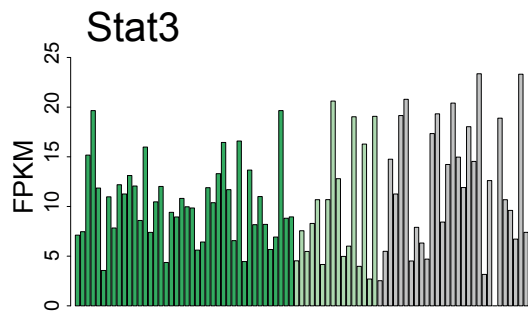

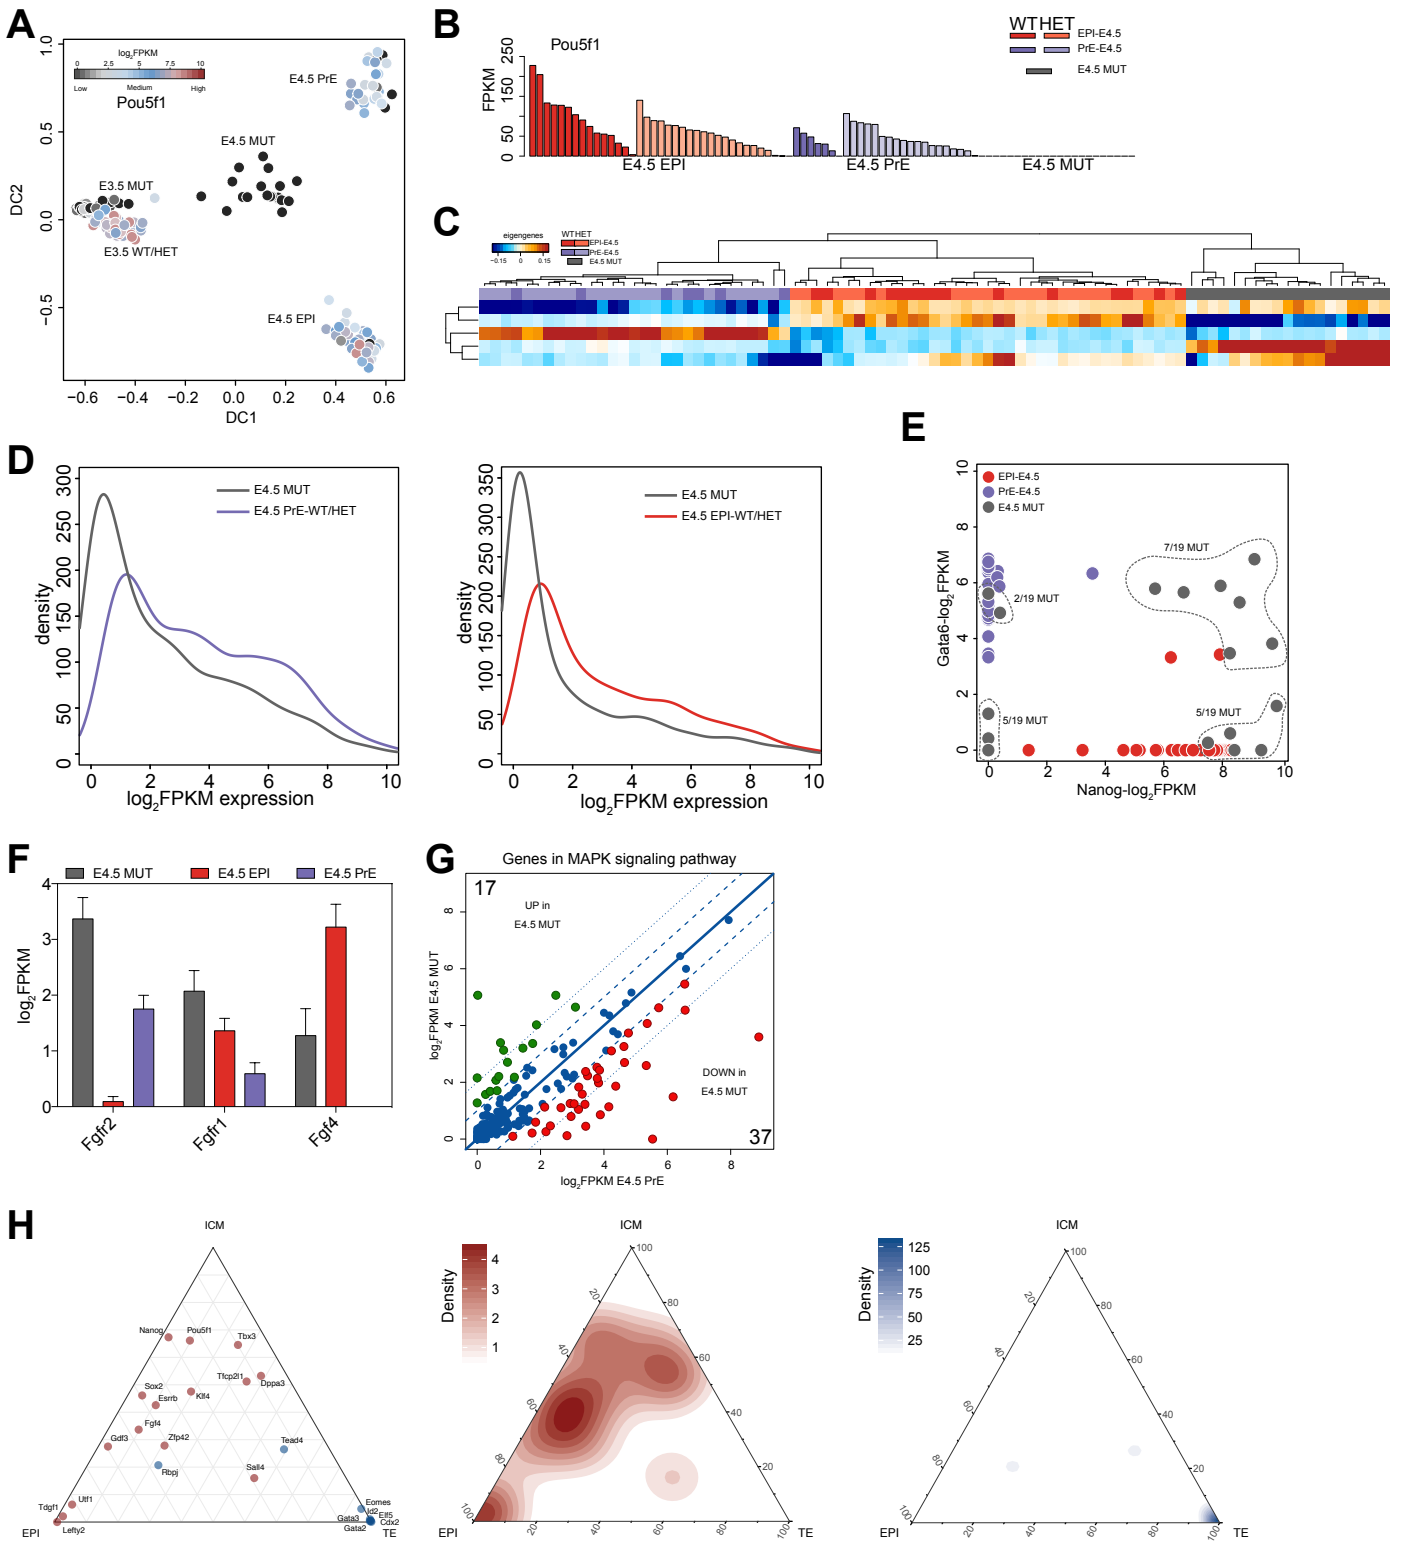

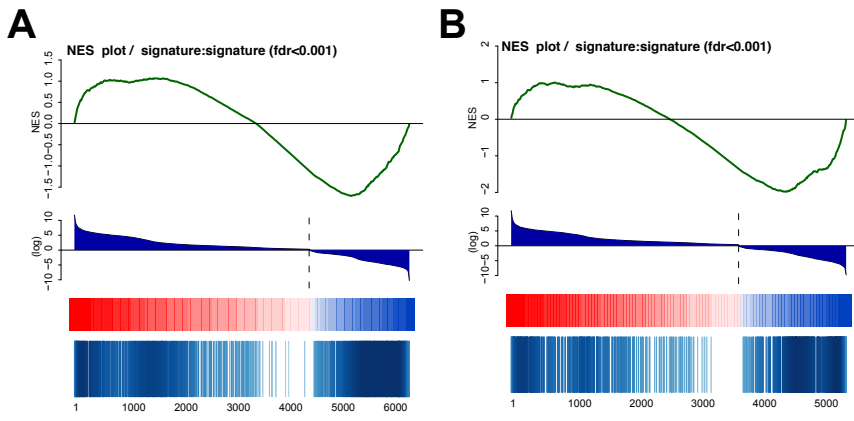





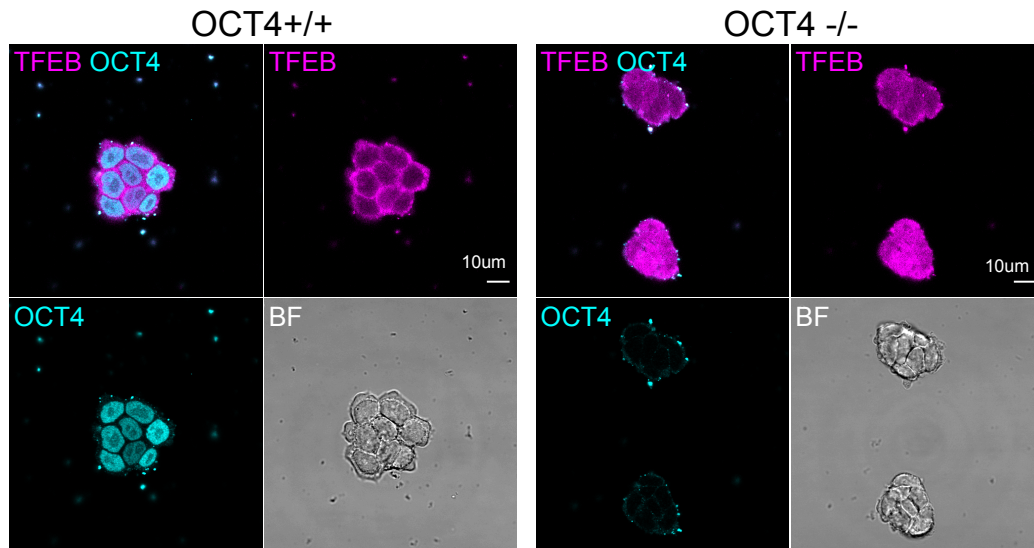

Source: https://www.biorxiv.org/content/10.1101/2020.01.28.922856v1.full.pdf
